# Supplementary material for: Maternal-fetal immune responses in pregnant women infected with SARS-CoV-2
Source: PubMed Central journal article supplement (PMC8766450; doi:10.1038/s41467-021-27745-z), 2022-01-18
Supplement: 41467_2021_27745_MOESM1_ESM.pdf [file 41467_2021_27745_MOESM1_ESM.pdf]

## Supplementary Information

### Maternal-Fetal Immune Responses in Pregnant Women Infected with SARS-CoV-2

Valeria Garcia-Flores<sup>1,2</sup>, Roberto Romero<sup>1,3-6,\*</sup>, Yi Xu<sup>1,2</sup>, Kevin Theis<sup>1,2,7</sup>, Marcia Arenas-Hernandez<sup>1,2</sup>, Derek Miller<sup>1,2</sup>, Azam Peyvandipour<sup>1,2,5</sup>, Gaurav Bhatti<sup>1,2</sup>, Jose Galaz<sup>1,2</sup>, Meyer Gershater<sup>1,2</sup>, Dustyn Levenson<sup>1,2</sup>, Errile Pusod<sup>1,2</sup>, Li Tao<sup>1,2</sup>, David Kracht<sup>1,2</sup>, Violetta Florova<sup>1,2</sup>, Yaozhu Leng<sup>1,2</sup>, Kenichiro Motomura<sup>1,2</sup>, Robert Para<sup>1,2</sup>, Megan Faucett<sup>1,2</sup>, Chaur-Dong Hsu<sup>1,2,8</sup>, Gary Zhang<sup>5</sup>, Adi L. Tarca<sup>1,2,9</sup>, Roger Pique-Regi<sup>1,2,5,\*</sup>, Nardhy Gomez-Lopez<sup>1,2,8,\*</sup>

<sup>1</sup>Perinatology Research Branch, Division of Obstetrics and Maternal-Fetal Medicine, Division of Intramural Research, *Eunice Kennedy Shriver* National Institute of Child Health and Human Development, National Institutes of Health, U.S. Department of Health and Human Services (NICHD/NIH/DHHS); Bethesda, Maryland, 20892 and Detroit, Michigan, 48201, USA;

<sup>2</sup>Department of Obstetrics and Gynecology, Wayne State University School of Medicine, Detroit, Michigan, 48201, USA;

<sup>3</sup>Department of Obstetrics and Gynecology, University of Michigan, Ann Arbor, Michigan, 48109, USA;

<sup>4</sup>Department of Epidemiology and Biostatistics, Michigan State University, East Lansing, Michigan, 48824, USA;

<sup>5</sup>Center for Molecular Medicine and Genetics, Wayne State University, Detroit, Michigan, 48201, USA;

<sup>6</sup>Detroit Medical Center, Detroit, Michigan, 48201, USA;

<sup>7</sup>Department of Biochemistry, Microbiology and Immunology, Wayne State University School of Medicine, Detroit, Michigan, 48201, USA;

<sup>8</sup>Department of Physiology, Wayne State University School of Medicine, Detroit, Michigan 48201, USA;

<sup>9</sup>Department of Computer Science, Wayne State University College of Engineering, Detroit, Michigan, 48201, USA

\*Corresponding authors:

[nardhy.gomez-lopez@wayne.edu](mailto:nardhy.gomez-lopez@wayne.edu)

[rpique@wayne.edu](mailto:rpique@wayne.edu)

[prbchiefstaff@med.wayne.edu](mailto:prbchiefstaff@med.wayne.edu)

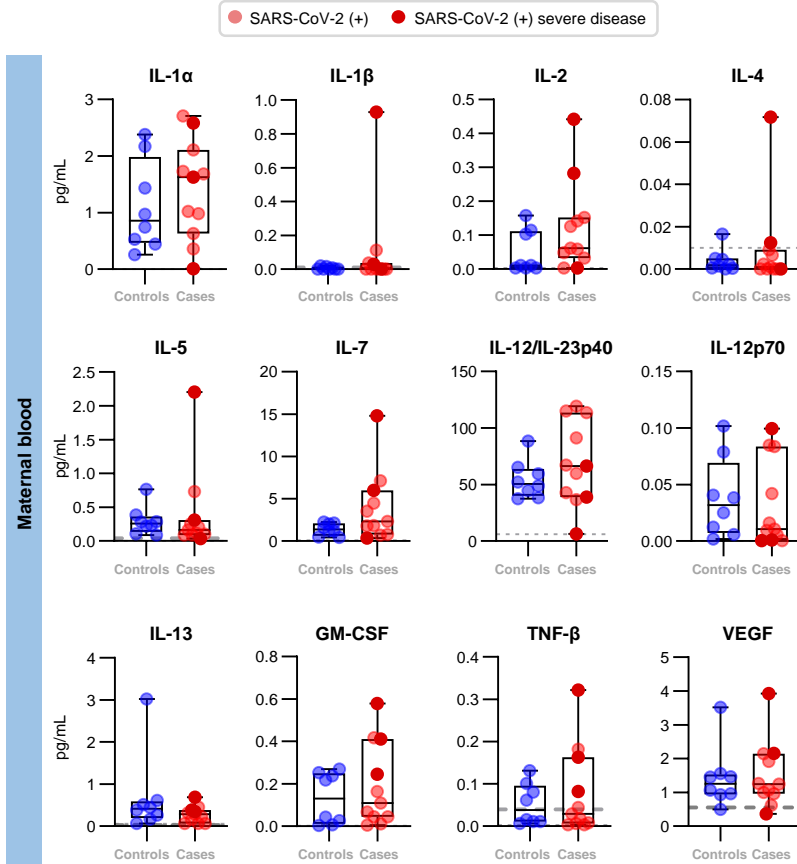

**Supplementary Figure 1. Cytokine concentrations in the peripheral blood of pregnant women with SARS-CoV-2 infection.** Plasma concentrations of IL-1 $\alpha$ , IL-1 $\beta$ , IL-2, IL-4, IL-5, IL-7, IL-12/IL-23p40, IL-12p70, IL-13, GM-CSF, TNF- $\beta$ , and VEGF from the maternal blood of SARS-CoV-2 (+) (n = 11) or control (n = 8) women. Data are shown as boxplots where midlines indicate medians, boxes indicate interquartile range, and whiskers indicate minimum/maximum range. Blue dots indicate control women, light red dots indicate SARS-CoV-2 (+) women, and dark red dots indicate women with severe COVID-19. Gray dotted lines indicate the lower limit of detection. Differences between groups were evaluated by using linear mixed-effect models. Significant differences are based on  $p < 0.05$ .

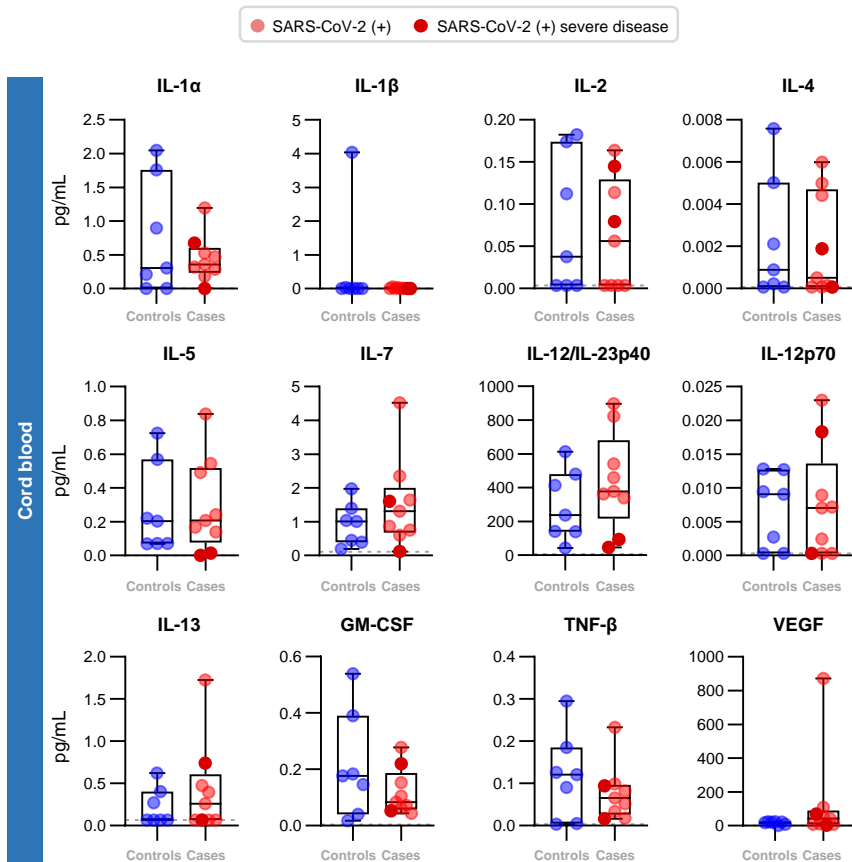

**Supplementary Figure 2. Cytokine concentrations in the cord blood of neonates born to women with SARS-CoV-2 infection.** Plasma concentrations of IL-1 $\alpha$ , IL-1 $\beta$ , IL-2, IL-4, IL-5, IL-7, IL-12/IL-23p40, IL-12p70, IL-13, GM-CSF, TNF- $\beta$ , and VEGF from the cord blood of neonates born to SARS-CoV-2 (+) (n = 9) or control women (n = 7). Data are shown as boxplots where midlines indicate medians, boxes indicate interquartile range, and whiskers indicate minimum/maximum range. Blue dots indicate control women, light red dots indicate SARS-CoV-2 (+) women, and dark red dots indicate women with severe COVID-19. Gray dotted lines indicate the lower limit of detection. Differences between groups were evaluated by linear mixed-effect models. Significant differences are based on  $p < 0.05$ .

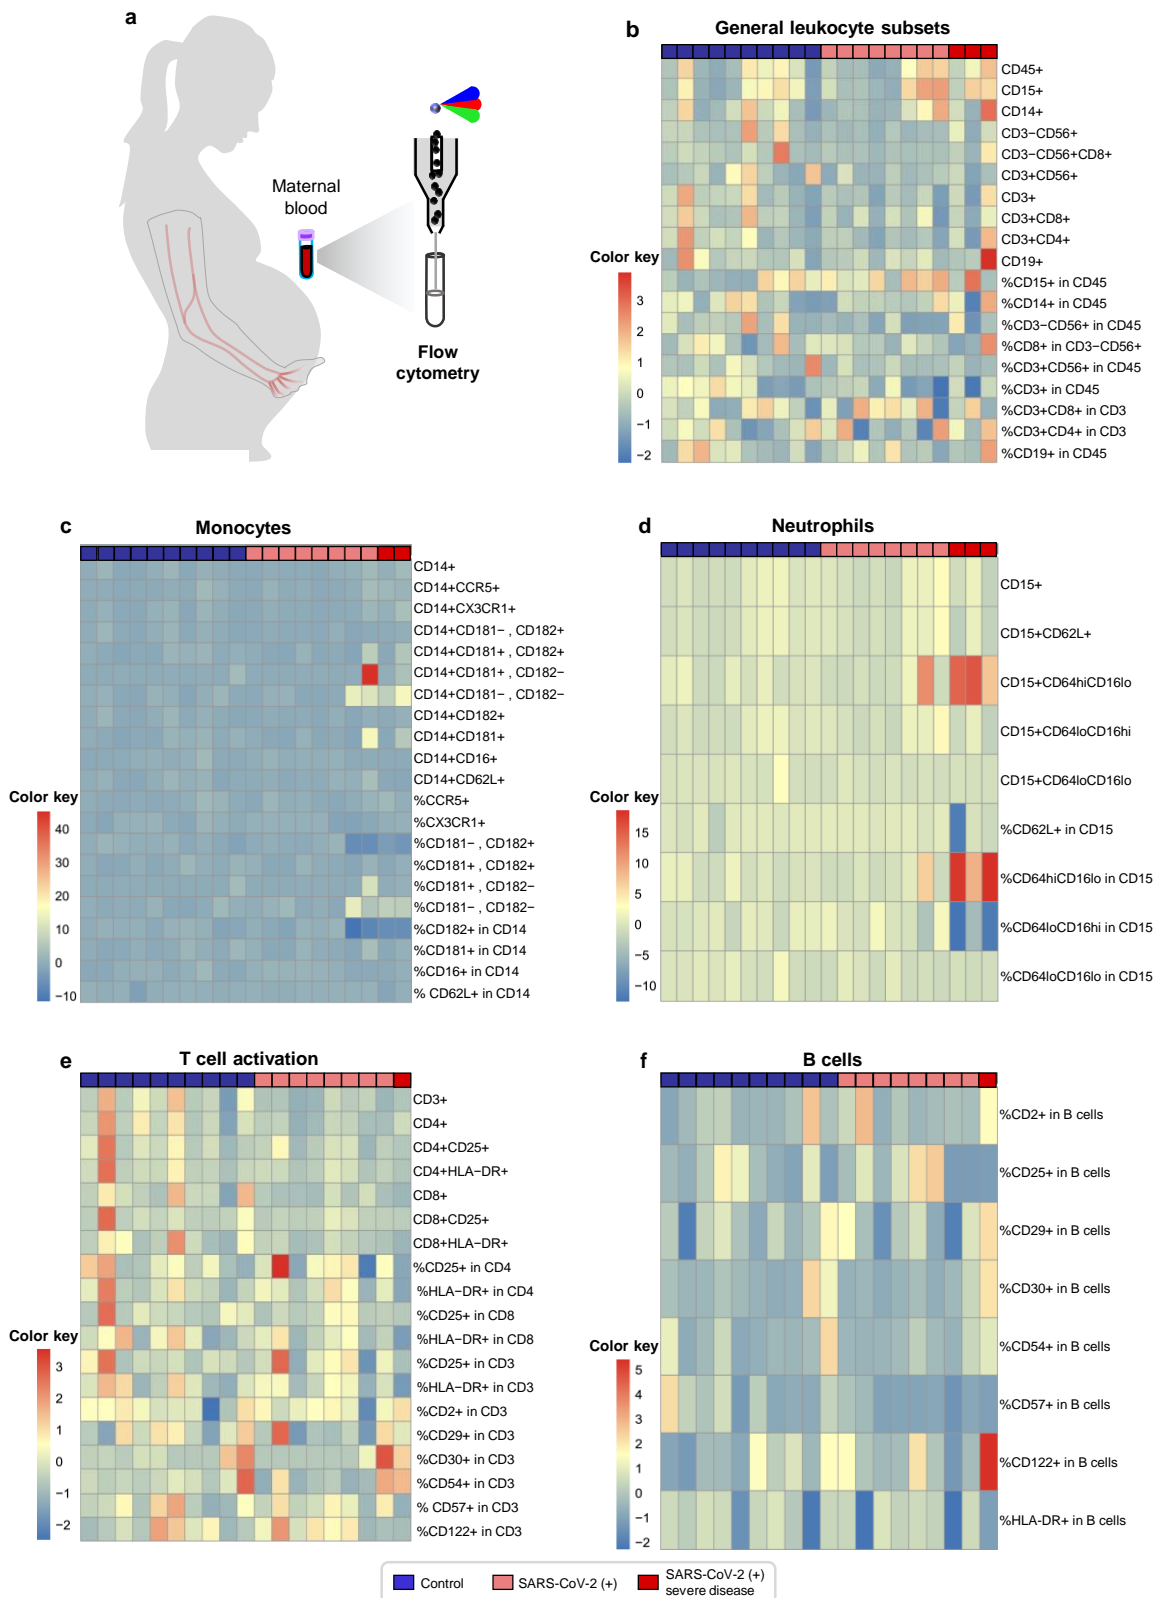

**Supplementary Figure 3. Immunophenotyping of leukocyte subsets in the maternal blood of women with SARS-CoV-2 infection.** (a) Peripheral blood was collected from SARS-CoV-2 (+) or control women (n = 9-11 per group) for immunophenotyping. Representative heat maps showing the abundance (z-scores) of (b) general leukocyte subsets, (c) monocyte subsets, (d) neutrophil subsets, (e) activated T-cell subsets, and (f) B cell subsets. Abundances are calculated using z-scores from the peripheral blood of SARS-CoV-2 (+) and control women. Blue squares indicate control women, light red squares indicate SARS-CoV-2 (+) women, and dark red squares indicate women with severe COVID-19. Red and blue indicate increased and decreased abundance, respectively.

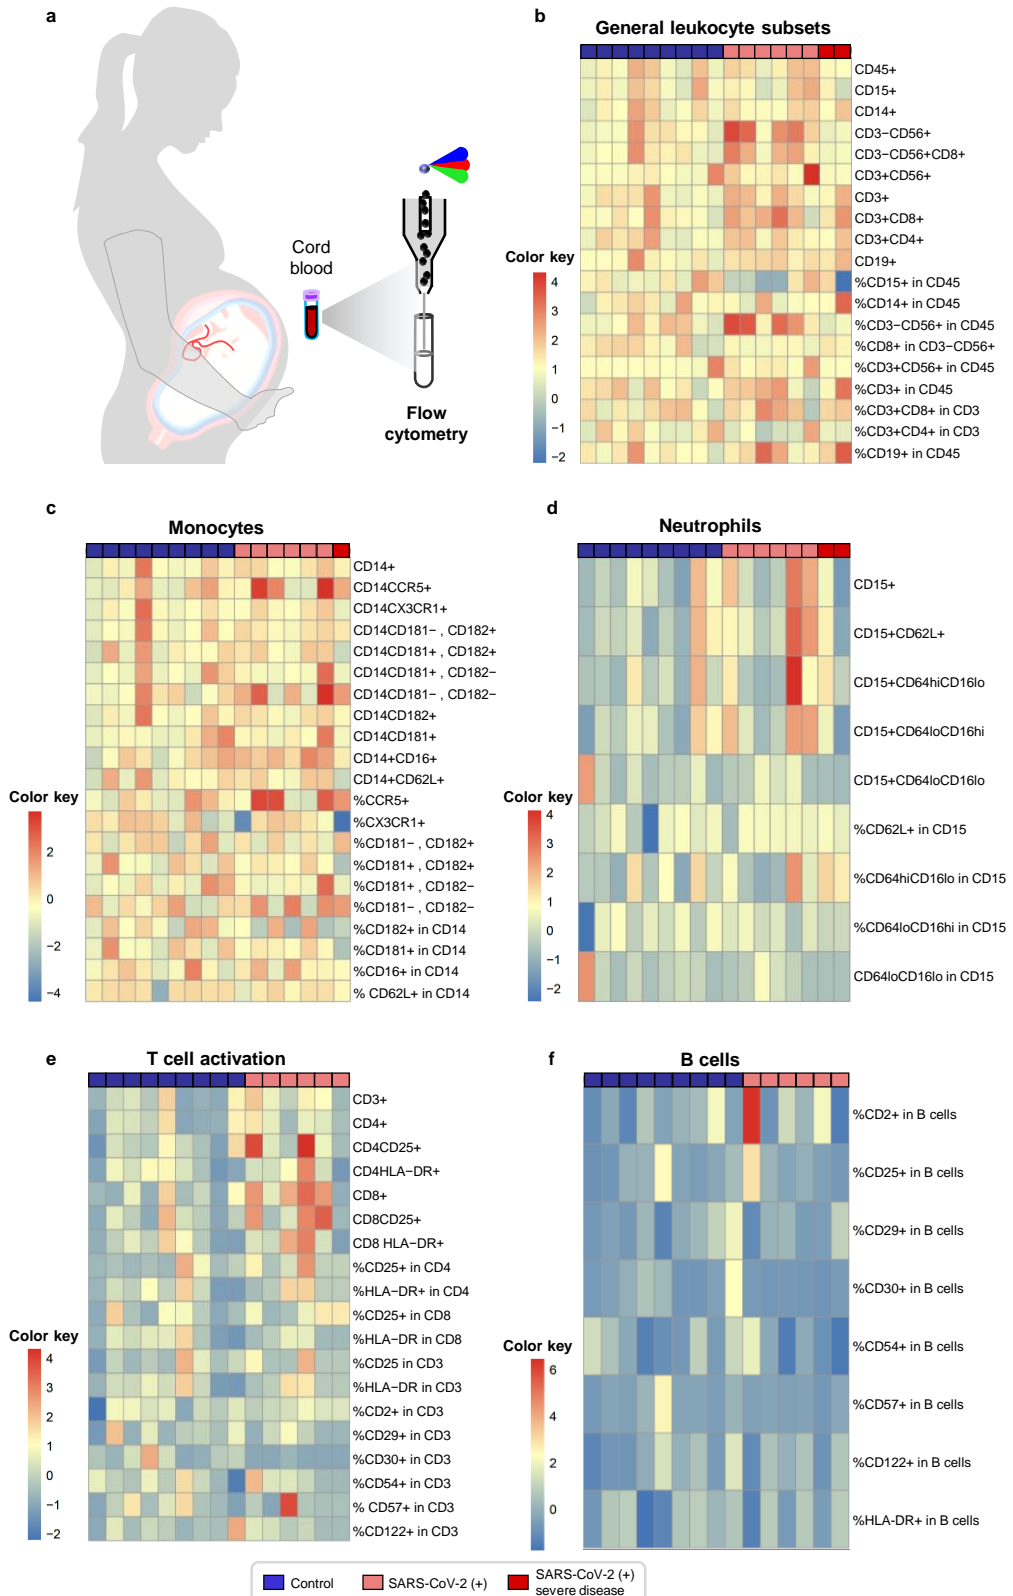

**Supplementary Figure 4. Immunophenotyping of leukocyte subsets in the cord blood of neonates born to women with SARS-CoV-2 infection.** (a) Cord blood was collected from neonates born to SARS-CoV-2 (+) or control women (n = 9-11 per group) for immunophenotyping. Representative heat maps showing the abundance (z-scores) of (b) general leukocyte subsets, (c) monocyte subsets, (d) neutrophil subsets, (e) activated T-cell subsets, and (f) B cell subsets. Abundances are calculated using z-scores from the cord blood of neonates born to SARS-CoV-2 (+) and control women. Blue squares indicate control women, light red squares indicate SARS-CoV-2 (+) women, and dark red squares indicate women with severe COVID-19. Red and blue indicate increased and decreased abundance, respectively.

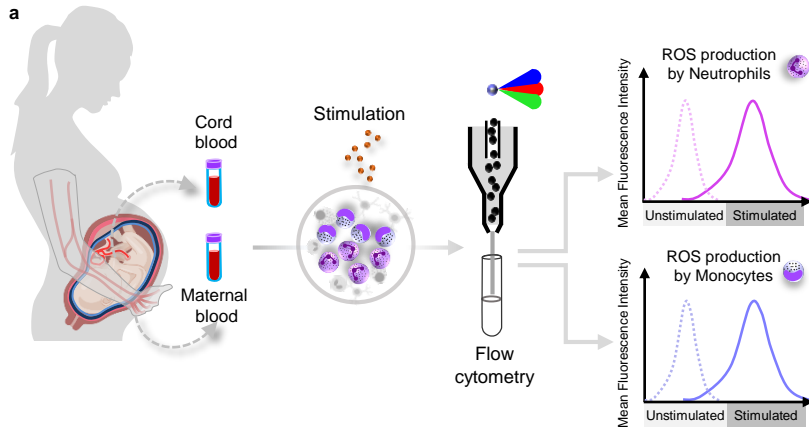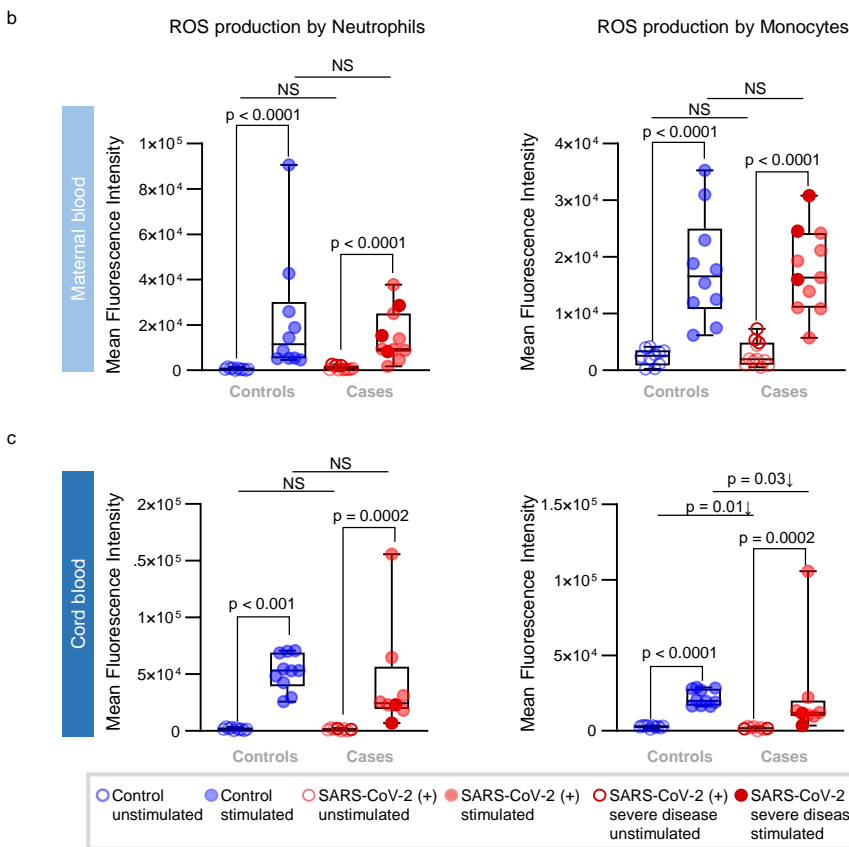

**Supplementary Figure 5. Reactive oxygen species production by neutrophils and monocytes in maternal and cord blood of women with SARS-CoV-2 infection and their neonates.** (a) Maternal blood [n = 10 control, 11 SARS-CoV-2 (+)] and cord blood [n = 10 control, 8 SARS-CoV-2 (+)] were collected and leukocytes were stimulated *in vitro* prior to the evaluation of reactive oxygen species (ROS) production by neutrophils and monocytes. ROS production by neutrophils and monocytes in (b) maternal peripheral blood and (c) cord blood with or without stimulation as represented by mean fluorescence intensity (MFI). Data are shown as boxplots where midlines indicate medians, boxes indicate interquartile range, and whiskers indicate minimum/maximum range. Differences between groups were evaluated by two-sided Mann-Whitney U-tests. P-values are considered significant when  $p < 0.05$ . Open dots indicate unstimulated cells and filled dots indicate stimulated cells. Blue dots indicate control women, light red dots indicate SARS-CoV-2 (+) women, and dark red dots indicate women with severe COVID-19.

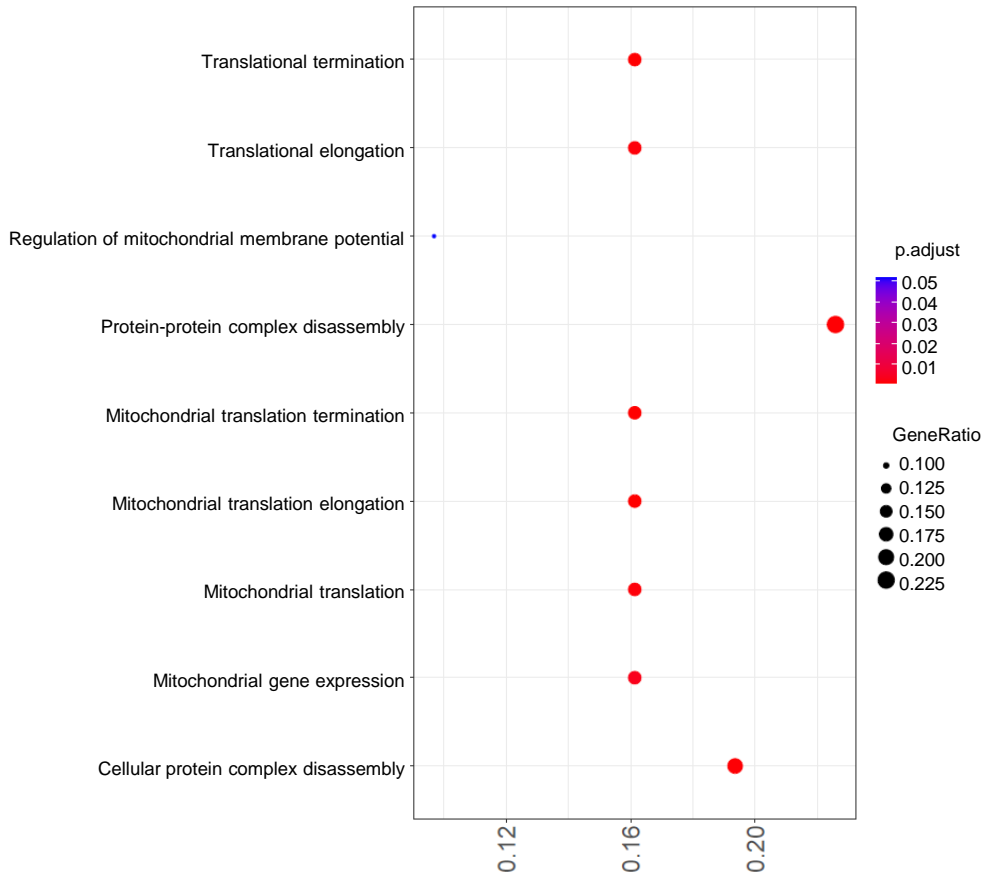

**Supplementary Figure 6. Gene Ontology (GO) terms shared between maternal T cells from the chorioamniotic membranes from SARS-CoV-2 (+) women and peripheral T-cell signatures from a reference report (Meckiff et al., 2020).** Over-representation analysis reporting enriched GO terms based on the common differentially expressed genes (DEGs;  $q < 0.1$ ) between maternal T cells from the chorioamniotic membranes from SARS-CoV-2 (+) women ( $n = 9$ ) and T cells from the reference report. Analyses were performed using one-sided Fisher's exact tests.



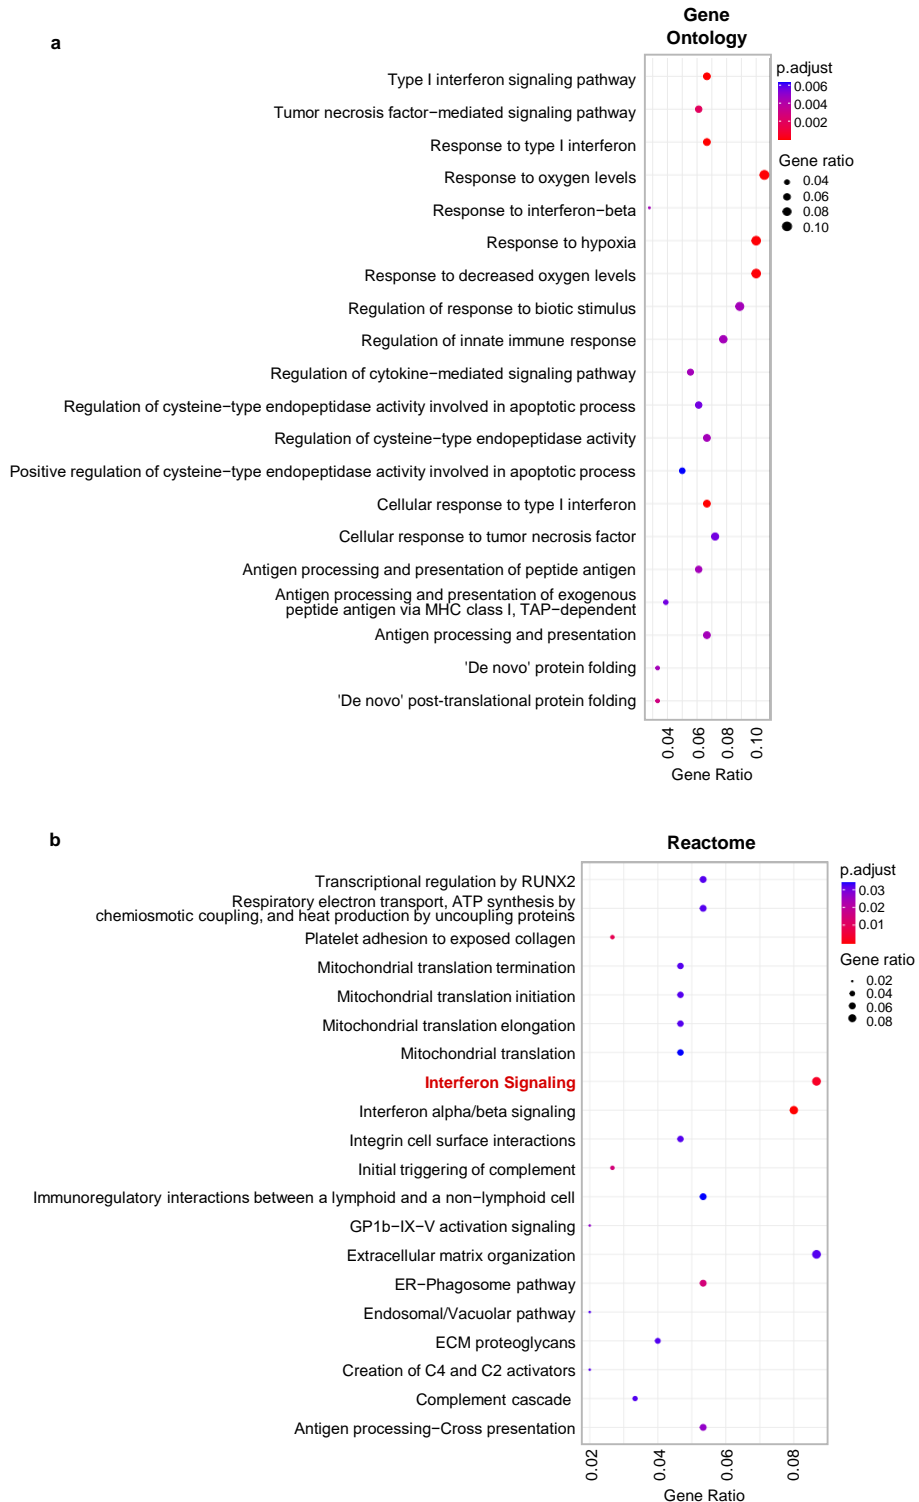

**Supplementary Figure 7. Gene Ontology (GO) and Reactome pathways of combined differentially expressed genes (DEGs) in the chorioamniotic membranes (CAM) and placental villi and basal plate (PVBP) associated with SARS-CoV-2 infection.** ClusterProfiler dot plots showing significant SARS-CoV-2-associated pathways ( $q < 0.10$ ) using over-representation analyses based on one-sided Fisher's exact tests on DEGs from the CAM and PVBP [n = 10 control, 9 SARS-CoV-2 (+)] based on the (a) GO and (b) Reactome databases.

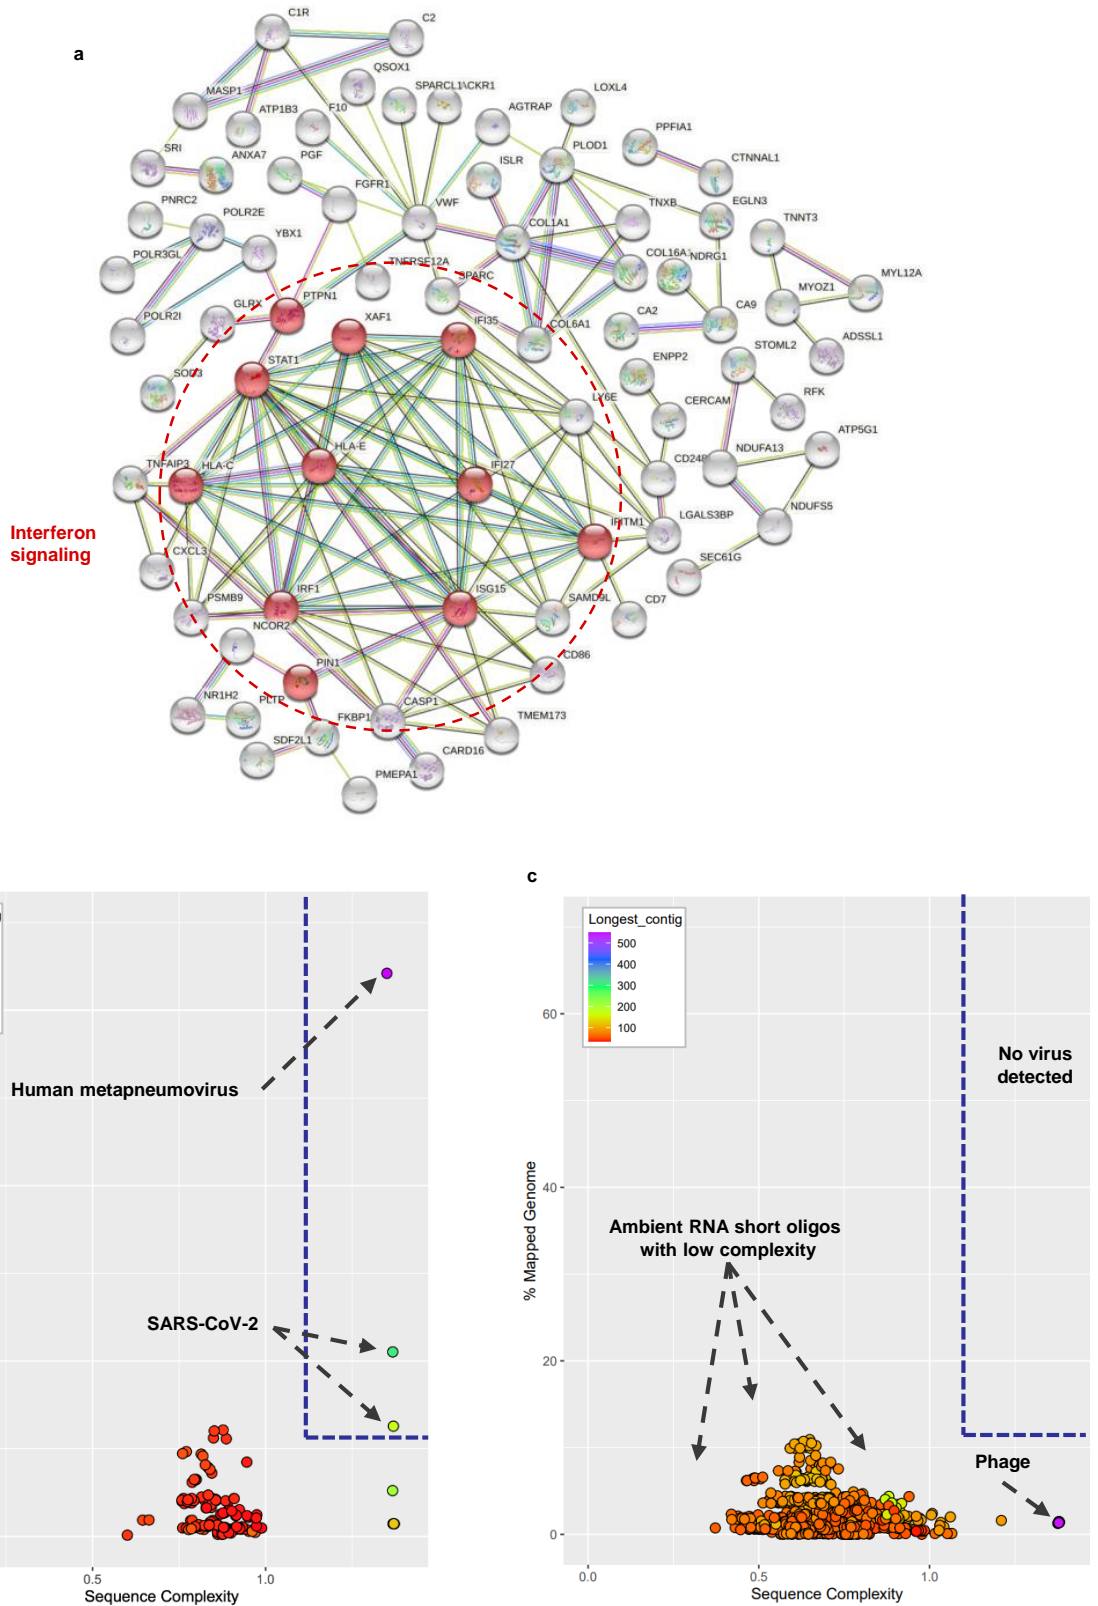

**Supplementary Figure 8. STRING enrichment analysis and viral detection in the placental tissues from pregnant women with SARS-CoV-2 infection.** (a) Search Tool for the Retrieval of Interacting Genes/Proteins (STRING) analysis was used to show interactions of differentially expressed genes (DEGs) associated with Interferon Signaling pathway derived from the Reactome database. DEGs were obtained from the single-cell RNA-seq data from the chorioamniotic membranes (CAM) and placental villi and basal plate (PVBP) of SARS-CoV-2 (+) ( $n = 9$ ) or control ( $n = 10$ ) women. Viral-Track scatter plots showing the presence of viral sequences in single-cell RNA-seq reads from (b) bronchoalveolar lavage of SARS-CoV-2 (+) patients derived from previously reported data (Bost et al., 2020) and (c) single-cell RNA-seq data from the CAM and PVBP of SARS-CoV-2 (+) and control women. Blue dashed lines represent thresholds for viral detection, with the virus name indicated by arrows.

Biological processes  
Maternal blood DEGs vs. Cord blood DEGs

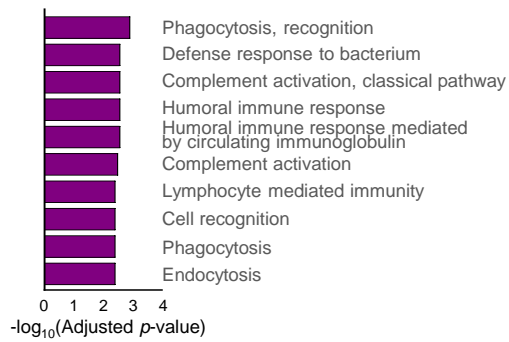

**Supplementary Figure 9. Biological processes enriched among genes exhibiting a differential response to SARS-CoV-2 infection between maternal and cord blood.** Bar plots showing the top 10 over-represented biological processes from Gene Ontology (GO) database based on the DEGs from the maternal blood compared to cord blood in response to SARS-CoV-2 infection with an adjusted  $p$ -value  $< 0.05$ .  $P$ -value was computed based on one-sided hypergeometric distribution and adjusted by false discovery rate.

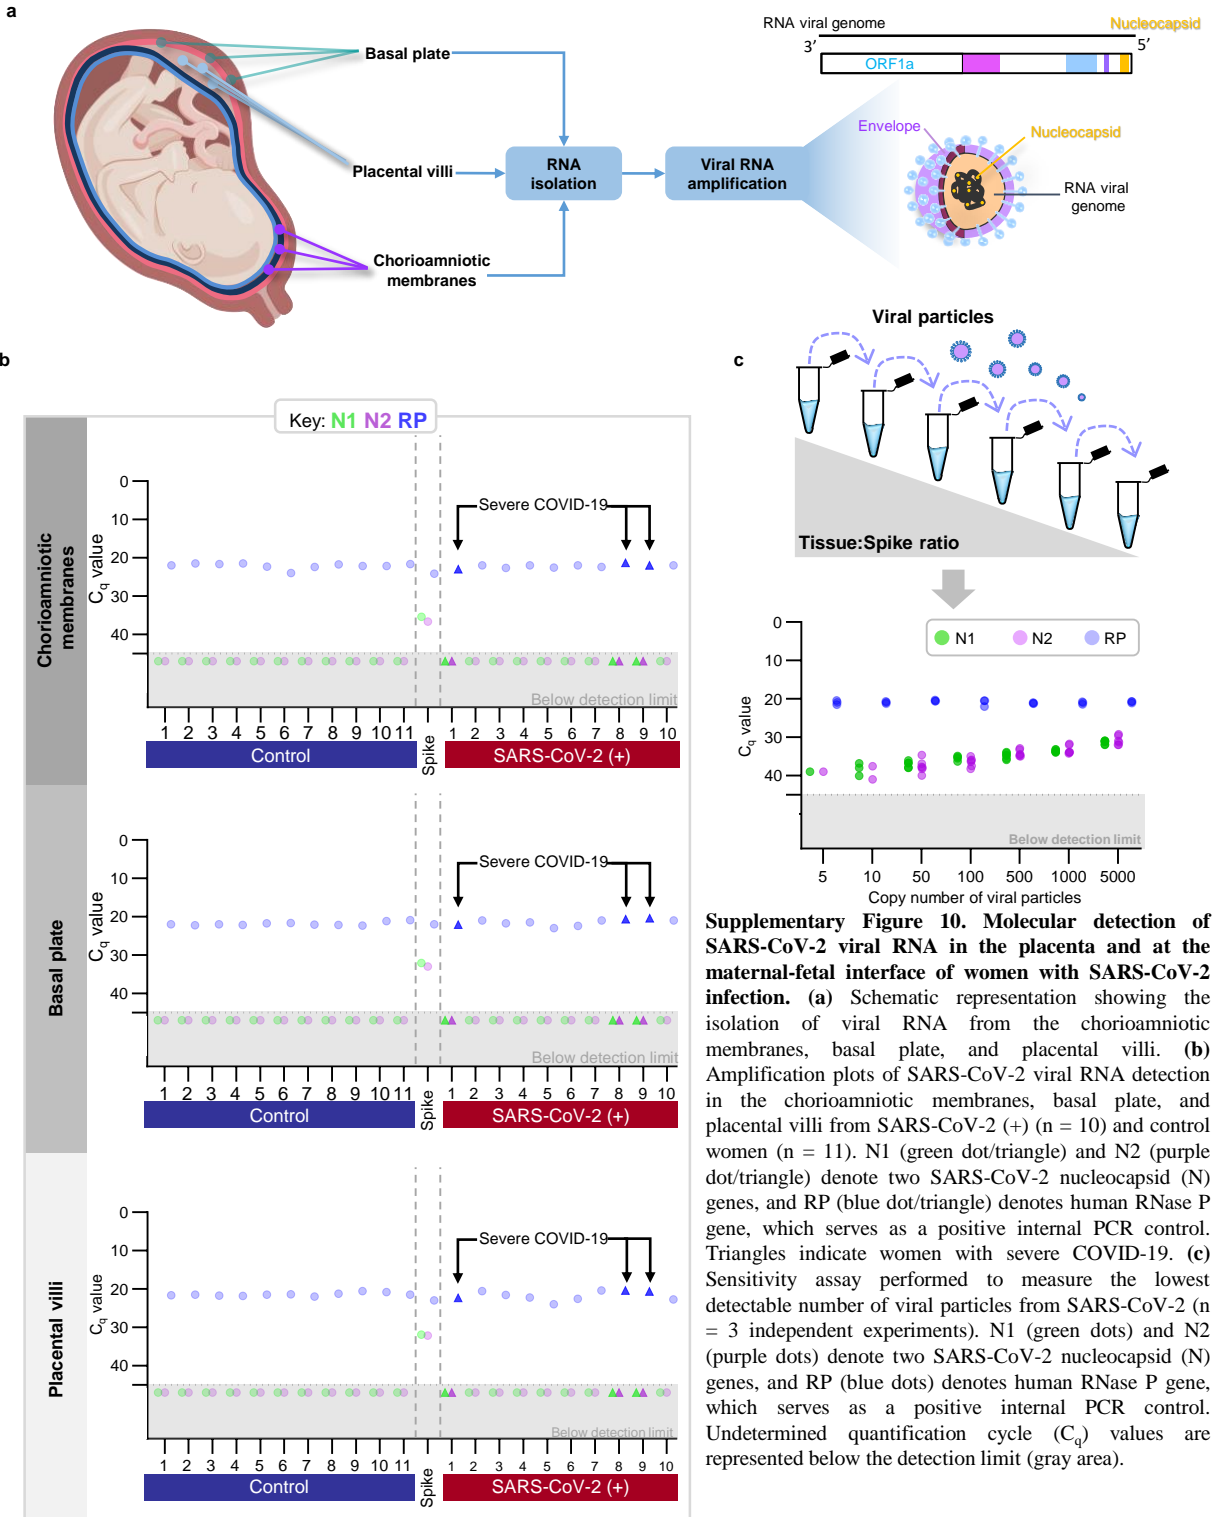

**Supplementary Table 1.** Clinical and demographic characteristics of control women and SARS-CoV-2 (+) patients. Differences between groups were evaluated by two-sided Mann-Whitney U-tests and two-sided Fisher's exact test. P values < 0.05 were used to denote a significant result.

|                                                                 | Controls<br>(n = 11) | SARS-CoV-2 (+)<br>(n = 12)    | p-value |
|-----------------------------------------------------------------|----------------------|-------------------------------|---------|
| Maternal age (years; median [IQR]) <sup>a</sup>                 | 29 (27-31.5)         | 26.5 (21-30.3)                | 0.3     |
| Body mass index (kg/m <sup>2</sup> ; median [IQR]) <sup>a</sup> | 34.2 (31.8-36)       | 30.9 (29.1-39.4)              | 0.2     |
| Primiparity <sup>b</sup>                                        | 18.2% (2/11)         | 16.7% (2/12)                  | 1.0     |
| Race/ethnicity <sup>b</sup>                                     |                      |                               | 1.0     |
| African-American                                                | 100% (11/11)         | 91.7% (11/12)                 |         |
| White                                                           | 0% (0/11)            | 8.3% (1/12)                   |         |
| Symptomatic for COVID-19                                        | -                    | 33.3% (4/12)                  | N/A     |
| Gestational age at delivery (weeks; median [IQR]) <sup>a</sup>  | 38.4 (38-39.4)       | 38.6 (38.4-39) <sup>c</sup>   | 0.8     |
| Labor <sup>b</sup>                                              | 72.7% (8/11)         | 72.7% (8/11) <sup>c</sup>     | 1.0     |
| Cesarean section <sup>b</sup>                                   | 45.5% (5/11)         | 36.4% (4/11) <sup>c</sup>     | 1.0     |
| Preeclampsia <sup>b</sup>                                       | 9.1% (1/11)          | 9.1% (1/11) <sup>c</sup>      |         |
| Birthweight (grams; median [IQR]) <sup>a</sup>                  | 3060 (2478-3398)     | 3210 (2688-3260) <sup>c</sup> | 0.9     |
| Apgar score at 1 min (median [IQR]) <sup>a</sup>                | 8 (8-8)              | 8 (8-8) <sup>c</sup>          | 0.1     |
| Apgar score at 5 min (median [IQR]) <sup>a</sup>                | 9 (9-9)              | 9 (9-9) <sup>c</sup>          | 1.0     |
| Acute maternal inflammatory response <sup>b</sup>               |                      |                               |         |
| Stage 1 (Early acute subchorionitis or chorionitis)             | 18.2% (2/11)         | 10% (1/10) <sup>d</sup>       | 1.0     |
| Acute fetal inflammatory response <sup>b</sup>                  |                      |                               |         |
| Stage 1 (Chorionic vasculitis or umbilical phlebitis)           | 9.1% (1/11)          | 20% (2/10) <sup>d</sup>       | 0.6     |
| Chronic maternal inflammatory response <sup>b</sup>             |                      |                               |         |
| Chronic villitis of unknown etiology                            | 18.2% (2/11)         | 0% (0/10) <sup>d</sup>        | 0.5     |
| Chronic chorioamnionitis                                        | 9.1% (1/11)          | 10% (1/10) <sup>d</sup>       | 1.0     |
| Chronic fetal inflammatory response <sup>b</sup>                |                      |                               |         |
| Eosinophilic T-cell vasculitis                                  | 0% (0/11)            | 10% (1/10) <sup>d</sup>       | 0.5     |
| Other placental lesions <sup>b</sup>                            |                      |                               |         |
| Maternal vascular malperfusion                                  | 18.2% (2/11)         | 0% (0/10) <sup>d</sup>        | 0.5     |
| Perivillous fibrin deposition                                   | 18.2% (2/11)         | 20% (2/10) <sup>d</sup>       | 1.0     |
| Intervillous thrombus                                           | 9.1% (1/11)          | 20% (2/10) <sup>d</sup>       | 0.6     |
| Intraplacental thrombus                                         | 9.1% (1/11)          | 10% (1/10) <sup>d</sup>       | 1.0     |

Data are given as median (interquartile range, IQR) and percentage (n/N). N/A: not applicable

<sup>a</sup>Mann-Whitney U test, <sup>b</sup>Fisher's exact test, <sup>c</sup>one missing datum, <sup>d</sup>two missing data.

**Supplementary Table 2.** Log<sub>2</sub> fold change (FC) in maternal and neonatal cytokine responses to SARS-CoV-2. For plots shown in Figure 1 and Supplementary Figures 1 and 2, undetected values were replaced with 99% of lowest detected values. Log<sub>2</sub> fold changes and their standard errors were obtained from linear mixed models. Two-sided likelihood ratio tests were used to test the significance of each cytokine's response to SARS-CoV-2. The nominal p-values were adjusted for multiple comparisons by calculating the false discovery rate adjusted p-values (q-values).

| Sample         | Cytokine       | log <sub>2</sub> FC | log <sub>2</sub> FCSE | p      | q    |
|----------------|----------------|---------------------|-----------------------|--------|------|
| Maternal blood | IL-8           | 2.55                | 0.59                  | <0.001 | 0.01 |
|                | IL-15          | 0.57                | 0.16                  | 0.002  | 0.02 |
|                | IL-10          | 1.18                | 0.53                  | 0.04   | 0.24 |
|                | IL-2           | 1.82                | 1.03                  | 0.09   | 0.39 |
|                | IL-13          | -1.00               | 0.60                  | 0.11   | 0.39 |
|                | IL-7           | 1.03                | 0.63                  | 0.12   | 0.39 |
|                | TNF- $\alpha$  | 0.85                | 0.59                  | 0.16   | 0.45 |
|                | GM-CSF         | 1.31                | 0.98                  | 0.19   | 0.45 |
|                | IL-12p70       | -1.46               | 1.16                  | 0.22   | 0.45 |
|                | IL-17A         | 0.67                | 0.56                  | 0.24   | 0.45 |
|                | IL-6           | 1.22                | 1.03                  | 0.25   | 0.45 |
|                | IL-1 $\beta$   | 2.16                | 2.31                  | 0.36   | 0.59 |
|                | IL-16          | 0.51                | 0.70                  | 0.47   | 0.68 |
|                | TNF- $\beta$   | 0.61                | 0.84                  | 0.48   | 0.68 |
|                | IL-1 $\alpha$  | -0.41               | 0.76                  | 0.59   | 0.79 |
|                | IFN- $\gamma$  | 0.54                | 1.37                  | 0.69   | 0.84 |
|                | IL-12/IL-23p40 | -0.15               | 0.41                  | 0.72   | 0.84 |
|                | IL-4           | -0.44               | 1.51                  | 0.77   | 0.84 |
|                | IL-5           | -0.16               | 0.64                  | 0.81   | 0.84 |
|                | VEGF           | -0.08               | 0.38                  | 0.84   | 0.84 |
| Cord blood     | IL-8           | 1.02                | 0.43                  | 0.03   | 0.57 |
|                | IL-5           | -1.31               | 0.90                  | 0.16   | 0.82 |
|                | TNF- $\alpha$  | 0.58                | 0.41                  | 0.17   | 0.82 |
|                | IL-6           | -1.28               | 0.93                  | 0.18   | 0.82 |
|                | GM-CSF         | -0.66               | 0.52                  | 0.21   | 0.82 |
|                | IL-10          | 0.72                | 0.61                  | 0.25   | 0.82 |
|                | VEGF           | 0.67                | 0.88                  | 0.45   | 0.98 |
|                | IL-17A         | 0.50                | 0.72                  | 0.49   | 0.98 |
|                | IL-12/IL-23p40 | 0.43                | 0.66                  | 0.52   | 0.98 |
|                | IL-2           | 0.59                | 1.21                  | 0.63   | 0.98 |
|                | IL-13          | 0.31                | 0.75                  | 0.68   | 0.98 |
|                | IL-15          | -0.07               | 0.18                  | 0.68   | 0.98 |
|                | IFN- $\gamma$  | -0.10               | 0.29                  | 0.73   | 0.98 |
|                | IL-1 $\alpha$  | 0.74                | 2.40                  | 0.76   | 0.98 |
|                | IL-1 $\beta$   | -0.30               | 2.53                  | 0.91   | 0.98 |
|                | TNF- $\beta$   | -0.09               | 0.85                  | 0.92   | 0.98 |
|                | IL-7           | -0.03               | 0.39                  | 0.93   | 0.98 |
|                | IL-12p70       | 0.09                | 1.20                  | 0.94   | 0.98 |
|                | IL-4           | -0.08               | 1.29                  | 0.95   | 0.98 |
| IL-16          | -0.02          | 0.69                | 0.98                  | 0.98   |      |

**Supplementary Table 3.** Summary of slides used for immunohistological detection of SARS-CoV-2 spike and nucleocapsid proteins. Number of slides used for immunohistochemistry staining at each placental location (placental villi, basal plate, and chorioamniotic membranes) from SARS-CoV-2 (+) and control women. Internal controls used include spiked or non-spiked tissues from healthy pregnant women.

| Group                  | Individual                                    | Number of slides processed for immunological detection of SARS-CoV-2 proteins |             |                          |       |
|------------------------|-----------------------------------------------|-------------------------------------------------------------------------------|-------------|--------------------------|-------|
|                        |                                               | Placenta villi                                                                | Basal plate | Chorioamniotic membranes | Total |
| Internal controls      | Non-spiked tissue from healthy pregnant woman | 2                                                                             | 2           | 2                        | 6     |
|                        | Spiked tissue from healthy pregnant woman     | 2                                                                             | 2           | 2                        | 6     |
| Control                | #1                                            | 14                                                                            | 10          | 6                        | 30    |
|                        | #2                                            | 14                                                                            | 10          | 6                        | 30    |
|                        | #3                                            | 14                                                                            | 10          | 6                        | 30    |
|                        | #4                                            | 14                                                                            | 10          | 6                        | 30    |
|                        | #5                                            | 14                                                                            | 10          | 6                        | 30    |
| SARS-CoV-2 (+) women   | #1<br>(severe COVID-19 disease)               | 14                                                                            | 10          | 6                        | 30    |
|                        | #2                                            | 14                                                                            | 10          | 6                        | 30    |
|                        | #3                                            | 14                                                                            | 10          | 6                        | 30    |
|                        | #4                                            | 14                                                                            | 10          | 6                        | 30    |
|                        | #5                                            | 14                                                                            | 10          | 6                        | 30    |
|                        | #6                                            | 14                                                                            | 10          | 6                        | 30    |
|                        | #7                                            | 14                                                                            | 10          | 6                        | 30    |
|                        | #8<br>(severe COVID-19 disease)               | 14                                                                            | 10          | 6                        | 30    |
|                        | #9                                            | 14                                                                            | 10          | 6                        | 30    |
|                        | #10                                           | 14                                                                            | 10          | 6                        | 30    |
| Total number of slides |                                               | 214                                                                           | 154         | 94                       | 462   |

**Supplementary Table 4.** Bacterial load in the placentas of women with SARS-CoV-2 infection. Comparison of bacterial load in the chorioamniotic membranes, placental amnion-chorion, and placental villous tree from SARS-CoV-2 (+) women who delivered by cesarean section or vaginally (n = 7) and from control women who delivered by cesarean section or vaginally (n = 8). The table shows no difference in the likelihood of having a bacterial load exceeding that of technical controls for background DNA contamination (i.e., blank DNA extraction kits).

|                          | <b>Control</b> | <b>SARS-CoV-2 (+)</b> | <b>Proportion z-test</b> |
|--------------------------|----------------|-----------------------|--------------------------|
| <b>Cesarean delivery</b> |                |                       |                          |
| Chorioamniotic membranes | 1/3 (33%)      | 0/2 (0%)              | z = 0.907, p = 0.545     |
| Placental amnion-chorion | 0/3 (0%)       | 1/2 (50%)             | z = -1.369, p = 0.513    |
| Placental villous tree   | 0/3 (0%)       | 2/2 (100%)            | z = -2.236, p = 0.151    |
| <b>Vaginal delivery</b>  |                |                       |                          |
| Chorioamniotic membranes | 5/5 (100%)     | 5/5 (100%)            | z = 0.000, p = 1.000     |
| Placental amnion-chorion | 5/5 (100%)     | 5/5 (100%)            | z = 0.000, p = 1.000     |
| Placental villous tree   | 4/5 (80%)      | 5/5 (100%)            | z = -1.054, p = 0.545    |

<sup>a</sup>Two-tailed, with Benjamini-Hochberg corrections applied



**Supplementary Table 5.** Antibodies used for immunophenotyping.

| <b>Antibody</b>        | <b>Fluorophore</b> | <b>Clone</b>                                | <b>Company</b>  | <b>Dilution factor</b> |
|------------------------|--------------------|---------------------------------------------|-----------------|------------------------|
| Isotype                | PE-Cy7             | RTK4530                                     | BioLegend       | 20                     |
| Isotype                | BV711              | X40                                         | BD Biosciences  | 20                     |
| Isotype                | PE-Cy5             | Clone MOPC-21                               | BD Biosciences  | 5                      |
| Isotype                | APC                | Clone MOPC-21                               | BD Biosciences  | 5                      |
| Isotype                | PE-CF594           | Clone X40                                   | BD Biosciences  | 20                     |
| Isotype                | Alexa488           | Clone 27-35                                 | BD Biosciences  | 20                     |
| CD3                    | BUV737             | UCHT1<br>(also known as UCHT-1, UCHT 1)     | BD Biosciences  | 50                     |
| CD4                    | APC-H7             | RPA-T4                                      | BD Biosciences  | 20                     |
| CD8 $\alpha$           | BUV395             | RPA-T8                                      | BD Biosciences  | 50                     |
| CD45RA                 | Alexa 700          | HI100                                       | BD Biosciences  | 20                     |
| CD196 (CCR6)           | Alexa 488          | G034E3                                      | BioLegend       | 20                     |
| CD197 (CCR7)           | PE-Cy7             | 3D12                                        | BD Biosciences  | 20                     |
| CD45                   | V450               | HI30                                        | BD Biosciences  | 20                     |
| CD183 (CXCR3)          | APC                | 1C6/CXCR3<br>(also known as 1C6, LS177-1C6) | BD Biosciences  | 5                      |
| CD3                    | APC-H7             | SK7                                         | BD Biosciences  | 20                     |
| CD19                   | PE-Cy5             | HIB19                                       | BD Biosciences  | 10                     |
| CD14                   | BUV395             | M $\phi$ P9                                 | BD Biosciences  | 20                     |
| CD45                   | Alexa700           | HI30                                        | BD Biosciences  | 20                     |
| CD4                    | BUV737             | SK3                                         | BD Biosciences  | 20                     |
| CD15                   | BV650              | HI98                                        | BD Biosciences  | 33                     |
| CD8                    | BV786              | RPA-T8                                      | BD Biosciences  | 50                     |
| CD56                   | BV711              | NCAM16.2                                    | BD Biosciences  | 20                     |
| CCR5 (CD195)           | BV711              | 2D7/CCR5                                    | BD Biosciences  | 20                     |
| CD181 (CXCR1)          | PE-Cy5             | 5A12                                        | BD Biosciences  | 5                      |
| CD182 (CXCR2)          | APC                | 6C6                                         | BD Biosciences  | 5                      |
| CD103                  | PE-Cy7             | Ber-ACT8                                    | BioLegend       | 20                     |
| Granzyme B             | PE-CF594           | GB11                                        | BD Biosciences  | 20                     |
| Perforin               | Alexa488           | $\delta$ G9                                 | BD Biosciences  | 20                     |
| CD62L                  | BV650              | DREG-56                                     | BD Biosciences  | 20                     |
| CD45RO                 | PE-Cy5             | UCHL1                                       | BD Biosciences  | 10                     |
| CD300a                 | PE                 | E59.126                                     | Beckman Coulter | 5                      |
| HLA-DR                 | PE-CF594           | G46-6                                       | BD Biosciences  | 20                     |
| CD2                    | BV421              | RPA-2.10                                    | BD Biosciences  | 20                     |
| CD19                   | Alexa488           | HIB19                                       | BD Biosciences  | 20                     |
| CD25                   | PE-Cy7             | M-A251                                      | BD Biosciences  | 20                     |
| CD29                   | BV510              | 4-Mar                                       | BD Biosciences  | 20                     |
| CD30                   | APC                | BerH8                                       | BD Biosciences  | 20                     |
| CD54                   | BV711              | HA58                                        | BD Biosciences  | 20                     |
| CD57                   | BV605              | QA17A04                                     | BioLegend       | 20                     |
| CD122 (IL-2R $\beta$ ) | PE                 | Clone TU27                                  | BioLegend       | 20                     |
| CD14                   | BV650              | M5E2                                        | BD Biosciences  | 20                     |
| CD15                   | BV605              | W6D3                                        | BD Biosciences  | 50                     |
| CD16                   | PerCP-Cy5.5        | Clone 3G8                                   | BD Biosciences  | 20                     |
| CD62L                  | PE-CF594           | DREG-56                                     | BD Biosciences  | 20                     |
| CD279                  | FITC               | MIH4                                        | BD Biosciences  | 20                     |
| CD64                   | APC-H7             | 10.1                                        | BD Biosciences  | 10                     |
| CX3CR1                 | PE-Cy7             | 2A9-1                                       | BioLegend       | 20                     |
