# Supplementary material for: Maternal-fetal immune responses in pregnant women infected with SARS-CoV-2
Source: PubMed Central journal article supplement (PMC8766450; doi:10.1038/s41467-021-27745-z), 2022-01-18
Supplement: 41467_2021_27745_MOESM2_ESM.pdf [file 41467_2021_27745_MOESM2_ESM.pdf]

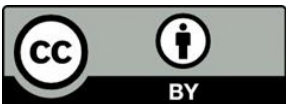

**Open Access** This file is licensed under a Creative Commons Attribution 4.0 International License, which permits use, sharing, adaptation, distribution and reproduction in any medium or format, as long as you give appropriate credit to the original author(s) and the source, provide a link to the Creative Commons license, and indicate if changes were made. In the cases where the authors are anonymous, such as is the case for the reports of anonymous peer reviewers, author attribution should be to 'Anonymous Referee' followed by a clear attribution to the source work. The images or other third party material in this file are included in the article's Creative Commons license, unless indicated otherwise in a credit line to the material. If material is not included in the article's Creative Commons license and your intended use is not permitted by statutory regulation or exceeds the permitted use, you will need to obtain permission directly from the copyright holder. To view a copy of this license, visit <http://creativecommons.org/licenses/by/4.0/>.

## Reviewers' Comments:

### Reviewer #1:

#### Remarks to the Author:

The manuscript by Garcia-Flores et al describes the immune responses of pregnant women that are SARS-CoV-2 infected at delivery and their placenta cell composition. The study is performed in seven pregnant women that test positive for SARS-CoV2 at delivery and 8 normal pregnant women. Blood was collected from the mothers and from the umbilical cord and shown analyzed for cytokines. It is unclear at this stage, whether those cytokines have similar probabilities to cross the placenta and whether the ones found in the cord blood are of embryonic origin. What appears clear though is that the T-cell lymphopenia observed in CoV patients is not present in the cord blood T cells. Neither are the local placental fetal immune responses. This is a carefully done study that shows that in mild cases of CoV 2 infection (there is a single severe case in this study) the placenta is rarely infected, there is maternal immune cell activation in the placenta but limited fetal immune reactions.

The authors have certainly data from neonatal T and B cells found in the placenta. It would be interesting to show and discuss the transcriptional profile of these cells compared to those from the mother and from control newborns.

### Reviewer #2:

#### Remarks to the Author:

This is an interesting and broad study by Garcia-Flores and colleagues ("Maternal-Fetal Immune Responses in Pregnant Women Infected with SARS-CoV-2") examining aspects of immunology and microbiology in seven pregnant people with molecular evidence of SARS-CoV-2 compared to eight pregnant individuals without molecular evidence of SARS-CoV-2. The study examines immunological, gene expression, histological and microbiological/microbiome correlates of infection comparing to the uninfected control group.

These studies were conducted by a strong investigative team with experience in all of the methods conducted and a long track record of conducting research in reproductive immunology and microbiology. A major strength of this study is the interdisciplinary nature. A major weakness of the study is the very small number of subjects included.

#### Major comments:

1. The small number of largely asymptomatic SARS-CoV-2 positive patients limits inferences that can be drawn due to issues related to the uncertainty of when these patients got infected and/or whether these were initial infections or even reinfections. Obviously, it is not possible to draw conclusions about moderate/severe/symptomatic infection from these small case numbers. Despite some interesting differences between cases and controls, the biological meaning of these differences is difficult to infer given the very small number of study cases, the lack of information as to when these mothers were infected (or, for that matter, re-infected), the paucity of symptomatic patients, and a lack of adverse pregnancy outcomes (making it hard to know how important these findings might be in terms of understanding the risk of COVID-19-related adverse pregnancy outcomes).

2. The majority of subjects in the study (both infected and uninfected) were in labor at the time of enrollment. How was duration of labor incorporated into the analyses or possibly impact outlier datapoints? Similarly, how did mode of delivery (vaginal/section) impact results, including outliers?

3. The microbiome work, while somewhat interesting, does not seem to mesh well with the story / study as a whole and it is unclear how the data inform us about the impact of COVID-19 on microbial ecology, especially given that we do not know when these patients were infected.

#### Minor comments:

1. The authors should add to the discussion about limitations of the current study. There is little information about when subjects were infected with SARS-CoV-2, whether infected subjects knew

they were infected at any time prior to admission for delivery, how the presence or absence of labor was incorporated into the analyses, and the impact of small numbers of subjects and some missing data. Also, did the duration of labor differ or influence results? How were data adjusted for mode of delivery or presence/duration/treatment of labor?

2. On page 18, starting on line 372, the authors note that "maternal macrophage responses may act as a double-edged sword in the chorioamniotic membranes of women with SARS-CoV-2 infection by modulating host immune responses while simultaneously contributing to placental vasculopathy." This statement is highly speculative and cannot be concluded on the basis of the data presented in this study.

3. The y-axes are not labeled in figure 1B. Also, in figure 1C there appear to be missing data for IL-6, IL-17 and IFN-g in the control group, with only three data points each.

4. Cytokine levels in the results section include a lot of non-statistically significant trends, which is inappropriate.

5. The cytokines significantly upregulated in maternal circulation (IL-15) of infected individuals are different from the cytokines upregulated in the fetal cord blood (IL-17, TNF). Given that the fetus has no detectable IgM, it would be helpful to discuss potential mechanisms for the differential cytokine responses between uninfected fetuses and their respective infected mothers.

6. Line 329- the authors mention IL-6 levels in neonatal cord blood of infected asymptomatic mothers, please consider mentioning specifically the IL-6 levels in the cord blood from the infected symptomatic mothers as well.

7. Regarding immunophenotyping: it would be helpful if the authors could make information about the distinction between "macrophage-1" and "macrophage-2" and similarly "stromal-1" "stromal-2" and "stromal-3" easily available- what parameters were used to distinguish them?

8. If possible, specify in PCA plots which dot belongs to the severely infected patient/fetus of that patient similar to how this was done in the cytokine plots with a more saturated color.

9. Figure 2B, Figure 3: specify in text (results or discussion) that the lowest T cell counts in cord blood consistently (with the exception of cord blood Tc17, where it's the second-lowest) come from the severely infected patient

10. Figure 2C: mark with asterisk which column of infected patients belongs to the severely infected patient.

76 **Reviewer #1 (Remarks to the Author):**

77  
78 The manuscript by Garcia-Flores et al describes the immune responses of pregnant women  
79 that are SARS-CoV-2 infected at delivery and their placenta cell composition. The study is  
80 performed in seven pregnant women that test positive for SARS-CoV2 at delivery and 8  
81 normal pregnant women. Blood was collected from the mothers and from the umbilical cord  
82 and shown analyzed for cytokines. It is unclear at this stage, whether those cytokines have  
83 similar probabilities to cross the placenta and whether the ones found in the cord blood are of  
84 embryonic origin. What appears clear though is that the T-cell lymphopenia observed in CoV  
85 patients is not present in the cord blood T cells. Neither are the local placental fetal immune  
86 responses. This is a carefully done study that shows that in mild cases of CoV 2 infection  
87 (there is a single severe case in this study) the placenta is rarely infected, there is maternal  
88 immune cell activation in the placenta but limited fetal immune reactions.

89  
90 **Author response to overall comment:** We thank the Reviewer for their helpful feedback  
91 and for taking the time to review our manuscript. We have addressed the Reviewer's  
92 feedback below.

93  
94 **Comment #1:** The authors have certainly data from neonatal T and B cells found in the  
95 placenta. It would be interesting to show and discuss the transcriptional profile of these cells  
96 compared to those from the mother and from control newborns.

97  
98 **A. Author response to comment #1:** We thank the Reviewer for providing us with these  
99 helpful recommendations that we believe have significantly improved our manuscript.  
100 We have made substantial revisions to our manuscript, which are described in an  
101 itemized manner below.

- 102 a. We have collected a total of eight sets of new samples [five additional SARS-  
103 CoV-2-infected pregnant women (two severe and three asymptomatic cases)  
104 and three controls], which brings our total group sizes to 12 SARS-CoV-2 cases  
105 (3 severe cases and 9 asymptomatic) and 11 controls. Each set of samples  
106 included maternal blood, cord blood, and/or placental tissues. Experiments were  
107 performed in all of these samples, which resulted in revisions to Figure 1  
108 through 5, Figure 7, and the generation of a new Figure 6 and Supplementary  
109 Figures 4, 7, and 9, and Supplementary Tables 4 through 8 and 12. Other  
110 supplementary materials (Supplementary Figures 1, 2, 3, 5, 6, 8, and 10 and  
111 Supplementary Tables 1, 2, and 9) were also revised.
- 112 b. To specifically respond to this comment, we have performed bulk RNA-  
113 sequencing of the cord blood and maternal blood samples from all women  
114 included in this study from which such samples were available (cord blood:  
115 SARS-CoV-2 (+) = 9, control = 8; maternal blood: SARS-CoV-2 (+) = 11, control  
116 = 10). The results of this set of experiments are shown in the new Figure 6 and  
117 Supplementary Figure 9 as well as Supplementary Tables 4 through 8. The  
118 transcriptomes of the maternal blood and cord blood were significantly  
119 correlated (new Figure 6b); however, some SARS-CoV-2 infection changes  
120 were specific to the mother or the neonate (new Figure 6b-c). Gene Ontology  
121 analysis revealed that the biological processes enriched in the upregulated  
122 differentially expressed genes (DEGs) in maternal blood included activation of  
123 the humoral immune response, including the classical pathway of complement

124  
125  
126  
127  
128  
129  
130  
131  
132  
133  
134  
135  
136  
137  
138  
139  
140  
141  
142  
143  
144  
145  
146  
147  
148  
149  
150  
151  
152  
153

activation, adaptive immune responses, and immunoglobulin-mediated immune response, whereas the downregulated DEGs included phagocytosis and extracellular matrix organization (new Figure 6d). In contrast, the biological processes enriched in the upregulated DEGs in cord blood were associated with defense response to fungus and bacterium (new Figure 6e). No significant biological processes were enriched in the downregulated DEGs. These results show that SARS-CoV-2 infection alters shared and non-shared specific immune processes in the mother and offspring.

- c. Furthermore, as suggested by the Reviewer, our newly generated bulk RNA-sequencing data from cord blood and maternal blood (new Figure 6a-e) were intersected with the single-cell RNA-sequencing (RNA-seq) immune signatures that were altered by SARS-CoV-2 infection (Figure 4d). Notably, chorioamniotic membrane (CAM) maternally-derived scRNA-seq signatures of T cell, Macrophage-2, and Monocyte (non-significant) were correlated with the maternal blood transcriptome, and the placental villi and basal plate (PVBP) fetally-derived scRNA-seq T cell signature was correlated with the cord blood transcriptome (new Fig. 6g). These data show that the transcriptomic profile of the mother and the neonate correlate with the maternal and fetal immune responses in the placenta. Correlation of SARS-CoV-2 changes in bulk transcriptomic data and those of B cells in the placenta were not feasible due to the rarity of these cells.

#### **B. Revisions located at:**

- a. **Changes resulting from the addition of new patients:** Figures 1- 5, new Figure 6, Figure 7; new Supplementary Figures 4, 7, and 9; Supplementary Figures 1 - 3, 5, 6, 8, and 10; new Supplementary Tables 4 – 8 and 12; Supplementary Tables 1, 2, and 9; Results, Pages 6 - 8, 10 - 13; Discussion, Page 16, 17, 19, 20.
- b. **Changes resulting from new RNA-seq experiments:** New Figure 6; New Supplementary Figure 9 and Supplementary Tables 4-8; Results, Pages 11-13; Methods, Page 32 - 33; Figure Legends, Page 62-63

154 **Reviewer #2 (Remarks to the Author):**

155

156 This is an interesting and broad study by Garcia-Flores and colleagues (“Maternal-Fetal  
157 Immune Responses in Pregnant Women Infected with SARS-CoV-2”) examining aspects of  
158 immunology and microbiology in seven pregnant people with molecular evidence of SARS-  
159 CoV-2 compared to eight pregnant individuals without molecular evidence of SARS-CoV-2.  
160 The study examines immunological, gene expression, histological and  
161 microbiological/microbiome correlates of infection comparing to the uninfected control group.  
162

163

164 These studies were conducted by a strong investigative team with experience in all of the  
165 methods conducted and a long track record of conducting research in reproductive  
166 immunology and microbiology. A major strength of this study is the interdisciplinary nature. A  
167 major weakness of the study is the very small number of subjects included.

168

169 **Author response to overall comment:** We thank the Reviewer for the helpful feedback and  
170 for taking the time to review our manuscript. We have addressed the Reviewer’s concerns  
171 regarding the small number of subjects included in this study by collecting a total of eight  
172 additional sets of new samples [five SARS-CoV-2-infected pregnant women (two severe and  
173 three asymptomatic cases) and three controls], which brings our total group sizes to 12  
174 SARS-CoV-2 cases (3 severe cases and 9 asymptomatic) and 11 controls. Each set of  
175 samples included maternal blood, cord blood, and/or placental tissues. Experiments were  
176 performed in all of these samples, which resulted in revisions to Figure 1 through 5, Figure 7,  
177 and the generation of a new Figure 6 and Supplementary Figures 4, 7, and 9, and  
178 Supplementary Tables 4 through 8 and 12. Other supplementary materials (Supplementary  
179 Figures 1, 2, 3, 5, 6, 8, and 10 and Supplementary Tables 1, 2, and 9) were also revised. We  
180 consider that the inclusion of these additional cases and controls has strengthened the  
181 findings of this study.

182

183 **Major comments:**

184 **Comment #1:** The small number of largely asymptomatic SARS-CoV-2 positive patients  
185 limits inferences that can be drawn due to issues related to the uncertainty of when these  
186 patients got infected and/or whether these were initial infections or even reinfections.  
187 Obviously, it is not possible to draw conclusions about moderate/severe/symptomatic  
188 infection from these small case numbers. Despite some interesting differences between  
189 cases and controls, the biological meaning of these differences is difficult to infer given the  
190 very small number of study cases, the lack of information as to when these mothers were  
191 infected (or, for that matter, reinfected), the paucity of symptomatic patients, and a lack of  
192 adverse pregnancy outcomes (making it hard to know how important these findings might be  
193 in terms of understanding the risk of COVID-19-related adverse pregnancy outcomes).

194

195 **A. Author response to comment #1:** We thank the Reviewer for raising these important  
196 points. We are responding to each of the Reviewer’s comments in an itemized manner  
197 below:

- 198 a. The prevalence of SARS-CoV-2 infection among pregnant women is low. After  
199 the COVID-19 pandemic began, multiple hospitals, including our institution,  
200 implemented universal screening for women admitted to Labor and Delivery  
201 units showing that the positivity rate was less than 5% (Am J Obstet Gynecol  
MFM. 2020 Nov;2(4):100226; Clin Infect Dis. 2021 Mar 1;72(5):869-872; Am J

202 Perinatol. 2020 Sep;37(11):1110-1114; J Perinat Med. 2021 Jun 10;49(6):717-  
203 722). Moreover, only a fraction of such women presented with severe COVID-19  
204 (Am J Obstet Gynecol. 2021 Jul;225(1):77.e1-77.e14). Therefore, the  
205 recruitment of women with SARS-CoV-2 infection, particularly those with severe  
206 COVID-19, is extremely challenging. Nonetheless, our team was able to recruit  
207 a total of five additional infected pregnant women, including two severe cases  
208 and three asymptomatic cases, as well as three additional healthy controls,  
209 which resulted in the addition of a new author and the reorganization of  
210 authorship. We consider that the inclusion of these additional samples has  
211 greatly strengthened our study.

- 212 b. The infected patients included in this cross-sectional study were diagnosed with  
213 SARS-CoV-2 at the time of admission using a PCR test. Given that the majority  
214 of infected patients displayed high levels of IgM in the maternal circulation, it is  
215 possible that these women were in the acute phase of infection at admission.  
216 Regardless, we are now including a limitations section in the discussion noting  
217 that the time of infection could not be considered for the interpretation of the  
218 findings in the current study.
- 219 c. As noted by the Reviewer, the majority of our SARS-CoV-2-infected patients did  
220 not present short-term adverse pregnancy outcomes; yet, one of the newly-  
221 included women with severe COVID-19 underwent emergency preterm  
222 cesarean section due to worsening respiratory function. This finding coincides  
223 with previous studies reporting that COVID-19 is associated with higher rates of  
224 indicated preterm birth (Am J Obstet Gynecol. 2021 Jul;225(1):77.e1-77.e14).  
225 Therefore, we consider that the findings reported in our study are timely.  
226 Furthermore, the data generated in our study show that, even in the absence of  
227 symptoms, neonates born to women infected with SARS-CoV-2 display aberrant  
228 immune responses in the placenta and cord blood. Thus, our findings  
229 underscore the potential long-term neonatal/infant consequences of SARS-CoV-  
230 2 infection during pregnancy, even in asymptomatic cases, which is also  
231 included in the revised discussion.

## 232 B. Revisions located at:

- 233 a. **Changes resulting from the addition of new patients:** Figures 1- 5, new  
234 Figure 6, Figure 7; new Supplementary Figures 4, 7, and 9; Supplementary  
235 Figures 1 - 3, 5, 6, 8, and 10; new Supplementary Tables 4 – 8 and 12;  
236 Supplementary Tables 1, 2, and 9; Results, Pages 6 - 8, 10 - 13; Discussion,  
237 Page 16, 17, 19, 20.
- 238 b. **New study limitations section:** Discussion, Page 21

239  
240 **Comment #2:** The majority of subjects in the study (both infected and uninfected) were in  
241 labor at the time of enrollment. How was duration of labor incorporated into the analyses or  
242 possibly impact outlier datapoints? Similarly, how did mode of delivery (vaginal/section)  
243 impact results, including outliers?

244  
245 **A. Author response to comment #2:** We thank the Reviewer for pointing out this matter,  
246 which we are responding to in an itemized manner.

- 247 a. The presence of labor and rate of cesarean section were both similar between  
248 the study and control groups, as shown in Supplementary Table 1. Regardless,  
249 we performed a model sensitivity analysis to determine whether adding these



250 two variables and additional covariates in the DESeq2 linear model could have  
251 a significant impact on any reported differences between the study groups.

- 252 b. For scRNA-seq analyses, we determined that adding a term controlling for  
253 library preparation batch in the model yielded the best results in terms of  
254 number of differentially expressed genes. We also evaluated the contribution of  
255 additional covariates (labor and delivery route); however, their impact was  
256 minimal compared to the model adjusting for batch effects only. Therefore,  
257 results after adjustment for batch effect are reported. We also kindly ask the  
258 Reviewer to consider that we lacked the statistical power to evaluate the effects  
259 of additional covariates in the model utilized to analyze scRNA-seq data. The  
260 adjustments performed in scRNA-seq data are now mentioned in the revised  
261 methods section.
- 262 c. With the newly added bulk RNA-seq data, in which all libraries were prepared in  
263 one batch, the batch effect was minimal. Yet, the number of samples allowed us  
264 to use a model that included maternal age, BMI, nulliparity, labor status, and  
265 delivery route as covariates. The adjustments performed in the bulk RNA-seq  
266 data are now mentioned in the revised methods section.

267 **B. Revisions located at: Methods, Pages 30, 33**

268  
269 **Comment #3:** The microbiome work, while somewhat interesting, does not seem to mesh  
270 well with the story / study as a whole and it is unclear how the data inform us about the impact  
271 of COVID-19 on microbial ecology, especially given that we do not know when these patients  
272 were infected.

273  
274 **A. Author response to comment #3:** We thank the Reviewer for requesting this  
275 clarification. We apologize for not justifying well the reasoning behind our investigation  
276 of the placental microbiome in the current study. The following paragraph has been  
277 added to the results section:

278 *“The traditional view is that the placenta is a sterile organ that is first colonized by*  
279 *vaginal microbes during delivery.<sup>39,40</sup> However, the sterility of the placenta could be*  
280 *compromised by microorganisms invading from the lower genital tract (i.e., ascending*  
281 *infection) or those present in the maternal circulation (i.e., hematogenous infection).<sup>41,42</sup>*  
282 *Therefore, we evaluated whether infection with the SARS-CoV-2 virus, which can be*  
283 *detected in vaginal fluid<sup>15</sup> or the peripheral circulation,<sup>43</sup> could compromise the sterility*  
284 *of the placenta.”*

285 We have now further justified the inclusion of these experiments/data in our study.

286 **B. Revisions located at: Results, Page 15**

287  
288 **Minor Comments:**

289 **Comment #4:** The authors should add to the discussion about limitations of the current study.  
290 There is little information about when subjects were infected with SARS-CoV-2, whether  
291 infected subjects knew they were infected at any time prior to admission for delivery, how the  
292 presence or absence of labor was incorporated into the analyses, and the impact of small  
293 numbers of subjects and some missing data. Also, did the duration of labor differ or influence  
294 results? How were data adjusted for mode of delivery or presence/duration/treatment of  
295 labor?



296  
297  
298  
299  
300  
301  
302  
303  
304  
305  
306  
307  
308  
309  
310  
311  
312  
313  
314  
315  
316  
317  
318  
319  
320  
321  
322  
323  
324  
325  
326  
327  
328  
329  
330  
331  
332  
333  
334  
335  
336  
337  
338  
339  
340  
341  
342

**A. Author response to comment #4:** We thank the Reviewer for bringing up these concerns. We are responding to the Reviewer in an itemized manner below:

- a. We are now including a limitations section in the discussion noting that the time of infection could not be considered in the current study, and acknowledging the number of samples included in the study.
- b. We performed additional analyses to determine whether covariates such as the presence of labor and mode of delivery could have a significant impact on the differences in single-cell transcriptomic data between the study groups. We performed a model sensitivity analysis to determine whether adding labor and delivery route as covariates could have a significant impact on any reported differences between the study groups. All scRNA-seq models evaluated included a batch variable; adding labor or mode of delivery only minimally increased the number of genes detected. Therefore, the scRNA-seq results presented in the current study were only adjusted for library preparation batch. Yet, the model utilized to analyze newly generated bulk RNA-seq data included maternal age, BMI, nulliparity, labor status, and delivery route as covariates.

**B. Revisions located at:** Discussion, Page 21; Methods, Pages 30, 33

**Comment #5:** On page 18, starting on line 372, the authors note that “maternal macrophage responses may act as a double-edged sword in the chorioamniotic membranes of women with SARS-CoV-2 infection by modulating host immune responses while simultaneously contributing to placental vasculopathy.” This statement is highly speculative and cannot be concluded on the basis of the data presented in this study.

**A. Author response to comment #5:** We thank the Reviewer for this comment. We have edited the above mentioned statement in the revised manuscript.

**B. Revisions located at:** Discussion, Page 19

**Comment #6:** The y-axes are not labeled in figure 1B. Also, in figure 1C there appear to be missing data for IL-6, IL-17 and IFN-g in the control group, with only three data points each.

**A. Author response to comment #6:** We thank the Reviewer for bringing up these points. We have addressed each of these concerns in an itemized manner below:

- a. The y-axes have been revised to include the proper labels. We apologize for this oversight.
- b. The cytokine data shown in Figure 1 were reanalyzed based on the Reviewer’s comment. In the revised Figure 1b-c and Supplementary Figures 1-2, the geometric mean was used to summarize data from duplicates to attenuate the effect of outlier values. If only one of the duplicate values was below the detection limit, the value above the detection limit was taken for that patient. Data below the detection limit in both duplicates were imputed with 99% of the minimum detected value across any sample. Differences between groups were assessed by linear mixed-effects models after log-transformation of the data. Therefore, cases were weighted differently depending on the number of data points above the detection limit and the within subject variance. The revised Supplementary Table 2 also provides the log<sub>2</sub> fold changes for each cytokine.

343 The revised analysis is now included in the revised methods section (Statistical  
344 analysis).

345 **B. Revisions located at:** Figure 1b-c, Supplementary Figures 1-2; Methods, Page 41  
346

347 **Comment #7:** Cytokine levels in the results section include a lot of non-statistically significant  
348 trends, which is inappropriate.

349  
350 **A. Author response to comment #7:** We thank the Reviewer for pointing out this matter.  
351 We have revised the cytokine results to only describe those findings that were  
352 statistically significant.

353 **B. Revisions located at:** Results, Pages 7-8  
354

355 **Comment #8:** The cytokines significantly upregulated in maternal circulation (IL-15) of  
356 infected individuals are different from the cytokines upregulated in the fetal cord blood (IL-17,  
357 TNF). Given that the fetus has no detectable IgM, it would be helpful to discuss potential  
358 mechanisms for the differential cytokine responses between uninfected fetuses and their  
359 respective infected mothers.

360  
361 **A. Author response to comment #8:** We thank the Reviewer for raising this point. After  
362 the inclusion of additional data from the new SARS-CoV-2-infected and control patients,  
363 we no longer observe changes in IL-17A or TNF in the cord blood (revised Figure 1c).  
364 Now, the only cytokine increased in the cord blood of neonates born to SARS-CoV-2-  
365 infected women is IL-8, which is also observed in the maternal circulation. This finding  
366 may represent the transfer of maternal cytokines through the placental tissues, which  
367 was mentioned in the discussion section.

368 **B. Revisions located at:** Figure 1b-c; Supplementary Figures 1-2; Results, Pages 7-8;  
369 Discussion, Pages 16-17  
370

371 **Comment #9:** Line 329- the authors mention IL-6 levels in neonatal cord blood of infected  
372 asymptomatic mothers, please consider mentioning specifically the IL-6 levels in the cord  
373 blood from the infected symptomatic mothers as well.

374  
375 **A. Author response to comment #9:** We thank the Reviewer for bringing up this point.  
376 After the addition of new cases and controls, no significant changes in IL-6  
377 concentrations were observed in the cord blood of SARS-CoV-2 cases. Therefore, we  
378 prefer to focus on the discussion of newly generated data.

379 **B. Revisions located at:** N/A  
380

381 **Comment #10:** Regarding immunophenotyping: it would be helpful if the authors could make  
382 information about the distinction between “macrophage-1” and “macrophage-2” and similarly  
383 “stromal-1” “stromal-2” and “stromal-3” easily available- what parameters were used to  
384 distinguish them?  
385

386 **A. Author response to comment #10:** We thank the Reviewer for requesting this  
387 clarification. The cell populations utilized in this study were defined according to  
388 previously published single-cell RNA-sequencing marker genes, as described in our  
389 prior study (Elife. 2019 Dec 12;8:e52004). Yet, the list of genes utilized for macrophage  
390 and stromal cell clusters is now shown as Supplementary Table 12.

391 **B. Revisions located at:** Supplementary Table 12; Methods, Page 29  
392

393 **Comment #11:** If possible, specify in PCA plots which dot belongs to the severely infected  
394 patient/fetus of that patient similar to how this was done in the cytokine plots with a more  
395 saturated color.  
396

397 **A. Author response to comment #11:** We thank the Reviewer for the kind  
398 recommendation. We have modified all plots, including PCA plots, accordingly to  
399 denote the samples derived from severely infected patients.

400 **B. Revisions located at:** Figures 1, 2, 3, 7, and 8; Supplementary Figures 1 - 5, and 10;  
401 Figure Legends, Pages 59 - 65  
402

403 **Comment #12:** Figure 2B, Figure 3: specify in text (results or discussion) that the lowest T  
404 cell counts in cord blood consistently (with the exception of cord blood Tc17, where it's the  
405 second-lowest) come from the severely infected patient.  
406

407 **A. Author response to comment #12:** We thank the Reviewer for pointing out this  
408 finding. We have included five new SARS-CoV-2-infected cases in our analysis, and  
409 after the addition of these samples the above observation is no longer reported.

410 **B. Revisions located at:** Figure 2b, Figure 3c  
411

412 **Comment #13:** Figure 2C: mark with asterisk which column of infected patients belongs to  
413 the severely infected patient.  
414

415 **A. Author response to comment #13:** We thank the Reviewer for the helpful  
416 recommendation. We have provided color coding to indicate the controls (blue),  
417 asymptomatic infected patients (light red), and the severe infected cases (dark red).

418 **B. Revisions located at:** Figure 2c and Supplementary Figures 3-4; Figure Legends,  
419 Page 59-60

Reviewers' Comments:

Reviewer #1:

Remarks to the Author:

The authors addressed my main concerns. The manuscript significantly increased in quality.

Reviewer #2:

Remarks to the Author:

The authors have addressed my concerns and improved the quality of the manuscript considerably.
