# Supplementary material for: Maternal-fetal immune responses in pregnant women infected with SARS-CoV-2
Source: PubMed Central journal article supplement (PMC8766450; doi:10.1038/s41467-021-27745-z), 2022-01-18
Supplement: 41467_2021_27745_MOESM3_ESM.pdf [file 41467_2021_27745_MOESM3_ESM.pdf]

## **Description of Additional Supplementary Files**

File Name: Supplementary Data 1

Description: Differentially expressed genes (DEGs) in the CAM and PVBP from women with SARS-CoV-2 infection

File Name: Supplementary Data 2

Description: Differentially expressed genes (DEGs) in the maternal blood from women with SARS-CoV-2 infection

File Name: Supplementary Data 3

Description: KEGG pathways enriched in the differentially expressed genes (DEGs) in the maternal blood from women with SARS-CoV-2 infection

File Name: Supplementary Data 4

Description: Differentially expressed genes (DEGs) in the cord blood from women with SARS-CoV-2 infection

File Name: Supplementary Data 5

Description: KEGG pathways enriched in the differentially expressed genes (DEGs) in the cord blood from women with SARS-CoV-2 infection.

File Name: Supplementary Data 6

Description: List of differentially expressed genes (DEGs) from the interaction analysis between maternal and cord blood in response to SARS-CoV-2 infection

File Name: Supplementary Data 7

Description: List of genes utilized to assign the cell type identities in CAM and PVBP
