# Supplementary material for: Maternal-fetal immune responses in pregnant women infected with SARS-CoV-2
Source: PubMed Central journal article supplement (PMC8766450; doi:10.1038/s41467-021-27745-z), 2022-01-18
Supplement: 41467_2021_27745_MOESM11_ESM.pdf [file 41467_2021_27745_MOESM11_ESM.pdf]

## Reporting Summary

Nature Research wishes to improve the reproducibility of the work that we publish. This form provides structure for consistency and transparency in reporting. For further information on Nature Research policies, see our [Editorial Policies](#) and the [Editorial Policy Checklist](#).

### Statistics

For all statistical analyses, confirm that the following items are present in the figure legend, table legend, main text, or Methods section.

n/a Confirmed

- The exact sample size ( $n$ ) for each experimental group/condition, given as a discrete number and unit of measurement
- A statement on whether measurements were taken from distinct samples or whether the same sample was measured repeatedly
- The statistical test(s) used AND whether they are one- or two-sided  
*Only common tests should be described solely by name; describe more complex techniques in the Methods section.*
- A description of all covariates tested
- A description of any assumptions or corrections, such as tests of normality and adjustment for multiple comparisons
- A full description of the statistical parameters including central tendency (e.g. means) or other basic estimates (e.g. regression coefficient) AND variation (e.g. standard deviation) or associated estimates of uncertainty (e.g. confidence intervals)
- For null hypothesis testing, the test statistic (e.g.  $F$ ,  $t$ ,  $r$ ) with confidence intervals, effect sizes, degrees of freedom and  $P$  value noted  
*Give  $P$  values as exact values whenever suitable.*
- For Bayesian analysis, information on the choice of priors and Markov chain Monte Carlo settings
- For hierarchical and complex designs, identification of the appropriate level for tests and full reporting of outcomes
- Estimates of effect sizes (e.g. Cohen's  $d$ , Pearson's  $r$ ), indicating how they were calculated

*Our web collection on [statistics for biologists](#) contains articles on many of the points above.*

### Software and code

Policy information about [availability of computer code](#)

Data collection

Data analysis   
  
 RNAseq analysis: Fastq files were aligned using kallisto, and bustools summarized the cell/gene transcript counts in a matrix for each sample. Each library was then processed using DIEM to eliminate debris and empty droplets. Cell Ranger version 4.0.0 (10X Genomics) was also used to align the scRNAseq reads using the STAR aligner to produce the bam files necessary for demultiplexing the individual of origin, based on the genotype information using souporecell (https://github.com/wheaton5/souporecell) and demuxlet (https://github.com/statgen/demuxlet). All count data matrices were then normalized and combined using Seurat version 3.1 (https://satijalab.org/seurat/). Different libraries were integrated and harmonized using the Harmony version 1.0 (https://portals.broadinstitute.org/harmony/articles/quickstart.html) To label the cells, the SingleR package version 1.3.8 (https://doi.org/doi:10.18129/B9.bioc.SingleR) was used to assign a cell-type identity. For differential gene expression, the negative binomial model implemented in DESeq2 version 1.28.1 (https://doi.org/doi:10.18129/B9.bioc.DESeq2) was used. ggplot2 R package version 3.3.2 (https://ggplot2.tidyverse.org/) was used to visualize the comparison between data generated in this study and a prior dataset, and the genes obtained from the combined datasets were further analyzed for gene set enrichment analysis (GSEA) and over-representation analysis (ORA) with clusterProfiler version 4.0.1 (https://doi.org/doi:10.18129/B9.bioc.clusterProfiler). The R-based computational pipeline Viral-Track was used to study viruses in raw scRNAseq data (github.com/PierreBSC/Viral-Track). The viral genomes were downloaded from the Virusite database version 2020.3 that includes all published viruses, viroids, and satellites (NCBI RefSeq).  
  
 Bulk RNA-seq analysis: Transcript abundance from RNA-seq reads was quantified with Salmon (https://github.com/COMBINE-lab/Salmon). The differential expression of genes between groups was tested by fitting a negative binomial distribution model implemented in DESeq2 version

1.28.1 (<https://doi.org/doi:10.18129/B9.bioc.DESeq2>). The differentially expressed genes for each group comparison were used as input in iPathwayGuide (<https://advaitabio.com/ipathwayguide/>) to identify the significantly impacted biological processes and pathways.

MiSeq analysis: 16S rRNA gene sequences were clustered into amplicon sequence variants (ASVs) defined by 100% sequence similarity using DADA2 version 1.12 according to the online MiSeq protocol (<https://benjjneb.github.io/dada2/tutorial.html>). Sequences were then classified using the silva\_nr\_v132\_train\_set database. decontam version 1.6.0 was used to identify amplicon sequence variants that were potential background DNA contaminants. Heatmaps of the 16S rRNA gene profiles of samples were generated using the open-source software program Morpheus (<https://software.broadinstitute.org/morpheus>). Variation in the 16S rRNA gene profiles were visualized through Principal Coordinates Analyses (PCoA) using the R package vegan version 2.5-6.

Flow cytometry analysis was performed using FlowJo version 10.

Statistical analysis: Statistical analyses were performed using SPSS v19.0 (IBM, Armonk, NY, USA) or the R package.

For manuscripts utilizing custom algorithms or software that are central to the research but not yet described in published literature, software must be made available to editors and reviewers. We strongly encourage code deposition in a community repository (e.g. GitHub). See the Nature Research [guidelines for submitting code & software](#) for further information.

## Data

Policy information about [availability of data](#)

All manuscripts must include a [data availability statement](#). This statement should provide the following information, where applicable:

- Accession codes, unique identifiers, or web links for publicly available datasets
- A list of figures that have associated raw data
- A description of any restrictions on data availability

The majority of the data generated in this study are included in the manuscript or in the Supplementary Materials. The genotyping and single-cell RNAseq data reported in this study have been submitted to the NIH dbGAP repository (accession number phs001886.v3.p1). All software and R packages used herein are detailed in the Materials and Methods. Scripts detailing the single-cell analyses are also available at <https://github.com/piquelab/covid19placenta>. The raw MiSeq data reported in this study have been deposited in the NCBI Sequence Read Archive (Bioproject ID: PRJNA701628). The bulk RNA-seq data from the maternal and cord blood were deposited in the Gene Expression Omnibus (accession number GSE: pending).

The STRING database (<https://string-db.org>) was utilized to identify and visualize the enrichment of GO terms among all differentially expressed genes.

## Field-specific reporting

Please select the one below that is the best fit for your research. If you are not sure, read the appropriate sections before making your selection.

- Life sciences       Behavioural & social sciences       Ecological, evolutionary & environmental sciences

For a reference copy of the document with all sections, see [nature.com/documents/nr-reporting-summary-flat.pdf](https://nature.com/documents/nr-reporting-summary-flat.pdf)

## Life sciences study design

All studies must disclose on these points even when the disclosure is negative.

|                 |                                                                                                                                                                                                                                                                                                                                                                                                                                  |
|-----------------|----------------------------------------------------------------------------------------------------------------------------------------------------------------------------------------------------------------------------------------------------------------------------------------------------------------------------------------------------------------------------------------------------------------------------------|
| Sample size     | Sample size calculations were not performed. Given the difficulty in obtaining samples from pregnant women positive for SARS-CoV-2, we included the maximum number of samples that could be collected within a reasonable time frame. The number of samples from control (SARS-CoV-2-negative) pregnant women were matched as closely as possible to those of the cases for each experiment to ensure similar statistical power. |
| Data exclusions | Data were not excluded from analysis.                                                                                                                                                                                                                                                                                                                                                                                            |
| Replication     | Given the novelty of studying pregnant women with COVID-19 and the limited patient samples available, we were unable to replicate our findings in a separate patient cohort. Yet, our findings are largely consistent with other studies and cases reports in non-pregnant and pregnant patients, which we discuss in our manuscript.                                                                                            |
| Randomization   | Patient randomization was not performed, as the study was focused on SARS-CoV-2-positive pregnant women and healthy pregnant women. We report that there were no differences in clinical and demographic covariates between the two study groups.                                                                                                                                                                                |
| Blinding        | The study was centered on the SARS-CoV-2 status of each patient, which for safety reasons was determined prior to sample collection and experimentation. Data collection and analysis were performed using computational pipelines or objective experimental thresholds that were applied equally to all samples.                                                                                                                |

## Reporting for specific materials, systems and methods

We require information from authors about some types of materials, experimental systems and methods used in many studies. Here, indicate whether each material, system or method listed is relevant to your study. If you are not sure if a list item applies to your research, read the appropriate section before selecting a response.

## Materials &amp; experimental systems

| n/a                                 | Involved in the study                                           |
|-------------------------------------|-----------------------------------------------------------------|
| <input type="checkbox"/>            | <input checked="" type="checkbox"/> Antibodies                  |
| <input checked="" type="checkbox"/> | <input type="checkbox"/> Eukaryotic cell lines                  |
| <input checked="" type="checkbox"/> | <input type="checkbox"/> Palaeontology and archaeology          |
| <input checked="" type="checkbox"/> | <input type="checkbox"/> Animals and other organisms            |
| <input type="checkbox"/>            | <input checked="" type="checkbox"/> Human research participants |
| <input checked="" type="checkbox"/> | <input type="checkbox"/> Clinical data                          |
| <input checked="" type="checkbox"/> | <input type="checkbox"/> Dual use research of concern           |

## Methods

| n/a                                 | Involved in the study                              |
|-------------------------------------|----------------------------------------------------|
| <input checked="" type="checkbox"/> | <input type="checkbox"/> ChIP-seq                  |
| <input type="checkbox"/>            | <input checked="" type="checkbox"/> Flow cytometry |
| <input checked="" type="checkbox"/> | <input type="checkbox"/> MRI-based neuroimaging    |

## Antibodies

## Antibodies used

Antibody, Name supplier, Catalog No, Clone name, Lot. No

Immunophenotyping

Isotype PE, BD Biosciences, Catalog No: 554648, Clone name: G155-178, Lot. No: 923862

Isotype PerCPCy5.5, BD Biosciences, Catalog No: 552834, Clone name: MOPC-21, Lot. No: 0079255

Isotype FITC, BD Biosciences, Catalog No: 340755, Clone name: X40, Lot. No: 9267160

Isotype A647, BioLegend, Catalog No: 557783, Clone name: MOPC-21, Lot. No: 9185417

Isotype BV421, BD Biosciences, Catalog No: 562748, Clone name: 27-35, Lot. No: 9301756

Isotype BV605, BioLegend, Catalog No: 400162, Clone name: MOPC-21, Lot. No: B310827

Isotype Alexa594, BD Biosciences, Catalog No: 562309, Clone name: R3-34, Lot. No: 0003996

Isotype PE-Cy7, BioLegend, Catalog No: 400618, Clone name: RTK4530, Lot. No: B266046

Isotype BV711, BD Biosciences, Catalog No: 563044, Clone name: X40, Lot. No: 8262906

Isotype PE-Cy5, BD Biosciences, Catalog No: 555750, Clone name: MOPC-21, Lot. No: 9066776

Isotype APC, BD Biosciences, Catalog No: 555751, Clone name: MOPC-21, Lot. No: 9038517

Isotype PE, BD Biosciences, Catalog No: 555749, Clone name: MOPC-21, Lot. No: 3046675

Isotype PE-CF594, BD Biosciences, Catalog No: 562292, Clone name: X40, Lot. No: 6083964

Isotype BV650, BD Biosciences, Catalog No: 563231, Clone name: X40, Lot. No: 0149138

Isotype BV786, BD Biosciences, Catalog No: 563847, Clone name: R3-34, Lot. No: 9345911

Isotype BV510, BD Biosciences, Catalog No: 562952, Clone name: R35-95, Lot. No: 0209308

Isotype BV711, BD Biosciences, Catalog No: 563283, Clone name: R3-34, Lot. No: 0240968

Isotype Alexa488, BD Biosciences, Catalog No: 558716, Clone name: 27-35, Lot. No: 0086827

Isotype Alexa700, BD Biosciences, Catalog No: 557882, Clone name: MOPC-21, Lot. No: 9322735

Isotype PE, BD Biosciences, Catalog No: 554685, Clone name: R3-34, Lot. No: 9141990

Isotype Alexa647, BD Biosciences, Catalog No: 400136, Clone name: MOPC-21, Lot. No: B287199

CD3 BUV737, BD Biosciences, Catalog No: 612750, Clone name: UCHT1 (also known as UCHT-1, UCHT 1), Lot. No: 9212190

CD4 APC-H7, BD Biosciences, Catalog No: 560158, Clone name: RPA-T4, Lot. No: 0029404

CD8 $\alpha$  BUV395, BD Biosciences, Catalog No: 563795, Clone name: RPA-T8, Lot. No: 9346411

CD45RA Alexa 700, BD Biosciences, Catalog No: 560673, Clone name: HI100, Lot. No: 6182503

CD196 (CCR6) Alexa 488, BioLegend, Catalog No: 353414, Clone name: G034E3, Lot. No: B255705

CD197 (CCR7) PE-Cy7, BD Biosciences, Catalog No: 557648, Clone name: 3D12, Lot. No: 9136737

CD45V450, BD Biosciences, Catalog No: 560367, Clone name: HI30, Lot. No: 9289771

CD183 (CXCR3) APC, BD Biosciences, Catalog No: 550967, Clone name: 1C6/CXCR3 (also known as 1C6, LS177-1C6), Lot. No: 9105766

CD3 APC-H7, BD Biosciences, Catalog No: 557832, Clone name: SK7, Lot. No: 9275889

CD19 PE-Cy5, BD Biosciences, Catalog No: 555414, Clone name: HIB19, Lot. No: 9155523

CD14 BUV395, BD Biosciences, Catalog No: 563561, Clone name: M $\phi$ P9, Lot. No: 0119039

CD45 Alexa700, BD Biosciences, Catalog No: 560566, Clone name: HI30, Lot. No: 0016145

CD4 BUV737, BD Biosciences, Catalog No: 612748, Clone name: SK3, Lot. No: 9276448

CD15 BV650, BD Biosciences, Catalog No: 564232, Clone name: HI98, Lot. No: 9337408

CD8 BV786, BD Biosciences, Catalog No: 563823, Clone name: RPA-T8, Lot. No: 9182913

CD56 BV711, BD Biosciences, Catalog No: 563169, Clone name: NCAM16.2, Lot. No: 0041400

MIP1 $\alpha$  PE, BD Biosciences, Catalog No: 554730, Clone name: 11A3, Lot. No: 9165847

MIP1 $\beta$  PerCPCy5.5, BD Biosciences, Catalog No: 560688, Clone name: D21-1351, Lot. No: 0024543

IL-1 $\alpha$  FITC, BD Biosciences, Catalog No: 340513, Clone name: AS5, Lot. No: 9165780

IL-1 $\beta$  Alexa647, BioLegend, Catalog No: 508208, Clone name: JK1B-1, Lot. No: B274564

IL-8 BV421, BD Biosciences, Catalog No: 563310, Clone name: G265-8, Lot. No: 9165979

TNF $\alpha$  BV605, BioLegend, Catalog No: 502936, Clone name: MAb11, Lot. No: B298444

IL-6 Alexa594, BD Biosciences, Catalog No: 563543, Clone name: MQ2-13A5, Lot. No: 0170548

CX3CR1PE-Cy7, BioLegend, Catalog No: 341612, Clone name: 2A9-1, Lot. No: B298605

CCR5 (CD195) BV711, BD Biosciences, Catalog No: 563395, Clone name: 2D7/CCR5, Lot. No: 1117612

CD181 (CXCR1) PE-Cy5, BD Biosciences, Catalog No: 551081, Clone name: 5A12, Lot. No: 0282711

CD182 (CXCR2 )APC, BD Biosciences, Catalog No: 551127, Clone name: 6C6, Lot. No: 0314355

IL-1 $\beta$  FITC, BD Biosciences, Catalog No: 340515, Clone name: AS10, Lot. No: 9311369

IL-1RA PE, BD Biosciences, Catalog No: 340525, Clone name: AS17, Lot. No: 0258978

CD103 PE-Cy7, BioLegend, Catalog No: 350212, Clone name: Ber-ACT8, Lot. No: B262937  
 Granzyme B PE-CF594, BD Biosciences, Catalog No: 562462, Clone name: GB11, Lot. No: 1005787  
 IFN $\gamma$  BV650, BD Biosciences, Catalog No: 563416, Clone name: 4S.B3, Lot. No: 0246087  
 IL-10 BV786, BD Biosciences, Catalog No: 564049, Clone name: JES3-9D7, Lot. No: 9009679  
 IL-2 BV510, BD Biosciences, Catalog No: 564167, Clone name: MQ1-17H12, Lot. No: 9072658  
 IL-4 BV711, BD Biosciences, Catalog No: 564112, Clone name: MP4-25D2, Lot. No: 9095675  
 Perforin Alexa488, BD Biosciences, Catalog No: 563764, Clone name:  $\delta$ G9, Lot. No: 9322656  
 IL-17A Alexa700, BD Biosciences, Catalog No: 560613, Clone name: N49-653, Lot. No: 0156497  
 IL-5 PE, BD Biosciences, Catalog No: 554395, Clone name: TRFK5, Lot. No: 8130811  
 IL-9 PerCP-Cy5.5, BD Biosciences, Catalog No: 561461, Clone name: MH9A3, Lot. No: 9116799  
 T-bet Alexa647, BD Biosciences, Catalog No: 561264, Clone name: 4B10, Lot. No: 0279857  
 CD62L BV650, BD Biosciences, Catalog No: 563808, Clone name: DREG-56, Lot. No: 9207222  
 CD45RO PE-Cy5, BD Biosciences, Catalog No: 555494, Clone name: UCHL1, Lot. No: 9108529  
 CD300a PE, Beckman Coulter, Catalog No: A22328, Clone name: E59.126, Lot. No: 200029  
 HLA-DR PE-CF594, BD Biosciences, Catalog No: 562304, Clone name: G46-6, Lot. No: 9155784  
 CD2 BV421, BD Biosciences, Catalog No: 562639, Clone name: RPA-2.10, Lot. No: 8254825  
 CD19 Alexa488, BD Biosciences, Catalog No: 557697, Clone name: HIB19, Lot. No: 9080789  
 CD25 PE-Cy7, BD Biosciences, Catalog No: 557741, Clone name: M-A251, Lot. No: 1068706  
 CD29 BV510, BD Biosciences, Catalog No: 747747, Clone name: MAR4, Lot. No: 9346335  
 CD30 APC, BD Biosciences, Catalog No: 563500, Clone name: BerH8, Lot. No: 9199297  
 CD54 BV711, BD Biosciences, Catalog No: 564078, Clone name: HA58, Lot. No: 9171772  
 CD57 BV605, BioLegend, Catalog No: 393304, Clone name: QA17A04, Lot. No: B299310  
 CD122 (IL-2R $\beta$ ) PE, BioLegend, Catalog No: 339006, Clone name: Clone TU27, Lot. No: B300806  
 CD10 BV395, BD Biosciences, Catalog No: 563871, Clone name: HI10a, Lot. No: 8262696  
 CD13 PE-Cy7, BD Biosciences, Catalog No: 338425, Clone name: L138, Lot. No: 0059888  
 CD14 BV650, BD Biosciences, Catalog No: 563419, Clone name: M5E2, Lot. No: 9093937  
 CD15 BV605, BD Biosciences, Catalog No: 562980, Clone name: W6D3, Lot. No: 9266360  
 CD16 PerCP-Cy5.5, BD Biosciences, Catalog No: 560717, Clone name: 3G8, Lot. No: 9325110  
 CD33 BV711, BD Biosciences, Catalog No: 563171, Clone name: WM53, Lot. No: 9336117  
 CD62L PE-CF594, BD Biosciences, Catalog No: 562301, Clone name: DREG-56, Lot. No: 9196191  
 CD123 BV786, BD Biosciences, Catalog No: 564196, Clone name: 7G3, Lot. No: 0233594  
 CD185 Alexa700/APC-Cy5.5, BioLegend, Catalog No: 356916, Clone name: J252D4, Lot. No: B254830  
 CD203c BV421, BD Biosciences, Catalog No: 563296, Clone name: NP4D6, Lot. No: 9316914  
 CD279 FITC, BD Biosciences, Catalog No: 557860, Clone name: MIH4, Lot. No: 9352010  
 CD64 APC-H7, BD Biosciences, Catalog No: 561190, Clone name: 10.1, Lot. No: 0134465  
 CD303 APC/Alexa647, BioLegend, Catalog No: 354206, Clone name: 201A, Lot. No: B287410  
 CD83 PE-Cy5, BD Biosciences, Catalog No: 551058, Clone name: HB15e, Lot. No: 8330949  
 CD172b PE, BD Biosciences, Catalog No: 552602, Clone name: B4B6, Lot. No: 9119970  
 Immunohistochemistry  
 Universal mouse isotype, Agilent, Catalog No: IS75061-2, Clone name: n/a, Lot. No: 10146824  
 Universal rabbit isotype, Agilent, Catalog No: IS60061-2, Clone name: n/a, Lot. No: 11301627  
 SARS-CoV-2 (COVID-19) spike, GeneTex, Catalog No: GTX632604, Clone name: n/a, Lot. No: 44168  
 SARS-CoV-2 (COVID-19) nucleocapsid, GeneTex, Catalog No: GTX135357, Clone name: n/a, Lot. No: 43957

## Validation

Immunophenotyping (Antibody, Species, Application, Sample used for validation, Dilution factor used for validation):  
 Isotype PE, Human, Flow cytometry, PBMCs stimulated with LPS, dilution factor tested in house  
 Isotype PerCP-Cy5.5, Human, Flow cytometry, PBMCs stimulated with human IFN- $\gamma$  and LPS, dilution factor recommended by manufacturer  
 Isotype FITC, Human, Flow cytometry, PBMCs stimulated with LPS, dilution factor tested in house  
 Isotype A647, Human, Flow cytometry, PBMCs stimulated with LPS, dilution factor recommended by manufacturer  
 Isotype V421, Human, Flow cytometry, PBMCs stimulated with LPS, dilution factor tested in house  
 Isotype BV605, Human, Flow cytometry, PBMCs stimulated with PMA plus ionomycin, recommended by manufacturer  
 Isotype Alexa594, Human, Flow cytometry, PBMCs stimulated with LPS, dilution factor tested in house  
 Isotype PE-Cy7, Human, Flow cytometry, Peripheral blood, dilution factor recommended by manufacturer  
 Isotype BV711, Human, Flow cytometry, Peripheral blood, dilution factor recommended by manufacturer  
 Isotype PE-Cy5, Human, Flow cytometry, Peripheral blood, dilution factor recommended by manufacturer  
 Isotype APC, Human, Flow cytometry, Peripheral blood, dilution factor recommended by manufacturer  
 Isotype PE, Human, Flow cytometry, PBMCs stimulated with LPS, dilution factor tested in house  
 Isotype PE-CF594, Human, Flow cytometry, PBMCs, dilution factor recommended by manufacturer  
 Isotype BV650, Human, Flow cytometry, PBMCs stimulated with PMA plus ionomycin, dilution factor tested in house  
 Isotype BV786, Human, Flow cytometry, PBMCs stimulated with LPS, dilution factor recommended by manufacturer  
 Isotype BV510, Human, Flow cytometry, PBMCs stimulated with PMA plus ionomycin, dilution factor recommended by manufacturer  
 Isotype BV711, Human, Flow cytometry, PBMCs stimulated with PMA plus ionomycin, dilution factor recommended by manufacturer  
 Isotype Alexa488, Human, Flow cytometry, PBMCs, dilution factor recommended by manufacturer  
 Isotype Alexa700, Human, Flow cytometry, PBMCs stimulated with PMA plus ionomycin, dilution factor recommended by manufacturer  
 Isotype PE, Human, Flow cytometry, PBMCs stimulated with immobilized anti-human CD3 + soluble anti-human CD28 + IL-2 + IL-4 and restimulated with PMA plus ionomycin, dilution factor tested in house  
 Isotype Alexa647, Human, Flow cytometry, PBMCs stimulated with PMA plus ionomycin, dilution factor tested in house

CD3 BUV737, Human, Flow cytometry, Peripheral blood, dilution factor tested in house  
 CD4 APC-H7, Human, Flow cytometry, Peripheral blood, dilution factor recommended by manufacturer  
 CD8 $\alpha$  BUV395, Human, Flow cytometry, Peripheral blood, dilution factor tested in house  
 CD45RA Alexa 700, Human, Flow cytometry, Peripheral blood, dilution factor recommended by manufacturer  
 CD196 (CCR6) Alexa 488, Human, Flow cytometry, Peripheral blood, dilution factor recommended by manufacturer  
 CD197 (CCR7) PE-Cy7, Human, Flow cytometry, Peripheral blood, dilution factor recommended by manufacturer  
 CD45V450, Human, Flow cytometry, Peripheral blood, dilution factor recommended by manufacturer  
 CD183 (CXCR3) APC, Human, Flow cytometry, Peripheral blood, dilution factor recommended by manufacturer  
 CD3 APC-H7, Human, Flow cytometry, Peripheral blood, dilution factor recommended by manufacturer  
 CD19 PE-Cy5, Human, Flow cytometry, Peripheral blood, dilution factor recommended by manufacturer  
 CD14 BUV395, Human, Flow cytometry, Peripheral blood, dilution factor recommended by manufacturer  
 CD45 Alexa700, Human, Flow cytometry, Peripheral blood, dilution factor recommended by manufacturer  
 CD4 BUV737, Human, Flow cytometry, Peripheral blood, dilution factor recommended by manufacturer  
 CD15 BV650, Human, Flow cytometry, Peripheral blood, dilution factor tested in house  
 CD8 BV786, Human, Flow cytometry, Peripheral blood, dilution factor tested in house  
 CD56 BV711, Human, Flow cytometry, Peripheral blood, dilution factor recommended by manufacturer  
 MIP1 $\alpha$  PE, Human, Flow cytometry, PBMCs stimulated with LPS, dilution factor recommended by manufacturer  
 MIP1 $\beta$  PerCPCy5.5, Human, Flow cytometry, PBMCs stimulated with human IFN- $\gamma$  and LPS, dilution factor recommended by manufacturer  
 IL-1 $\alpha$  FITC, Human, Flow cytometry, PBMCs stimulated with LPS, dilution factor recommended by manufacturer  
 IL-1 $\beta$  Alexa647, Human, Flow cytometry, PBMCs stimulated with LPS, dilution factor recommended by manufacturer  
 IL-8 BV421, Human, Flow cytometry, PBMCs stimulated with LPS, dilution factor recommended by manufacturer  
 TNF $\alpha$  BV605, Human, Flow cytometry, PBMCs stimulated with PMA plus ionomycin, dilution factor recommended by manufacturer  
 IL-6 Alexa594, Human, Flow cytometry, PBMCs stimulated with LPS, dilution factor recommended by manufacturer  
 CX3CR1 PE-Cy7, Human, Flow cytometry, Peripheral blood, dilution factor recommended by manufacturer  
 CCR5 (CD195) BV711, Human, Flow cytometry, Peripheral blood, dilution factor recommended by manufacturer  
 CD181 (CXCR1) PE-Cy5, Human, Flow cytometry, Peripheral blood, dilution factor recommended by manufacturer  
 CD182 (CXCR2 )APC, Human, Flow cytometry, Peripheral blood, dilution factor recommended by manufacturer  
 IL-1 $\beta$  FITC, Human, Flow cytometry, PBMCs stimulated with LPS, dilution factor recommended by manufacturer  
 IL-1RA PE, Human, Flow cytometry, PBMCs stimulated with LPS, dilution factor recommended by manufacturer  
 CD103 PE-Cy7, Human, Flow cytometry, PBMCs, dilution factor recommended by manufacturer  
 Granzyme B PE-CF594, Human, Flow cytometry, PBMCs, dilution factor recommended by manufacturer  
 IFN $\gamma$  BV650, Human, Flow cytometry, PBMCs stimulated with PMA plus ionomycin, dilution factor recommended by manufacturer  
 IL-10 BV786, Human, Flow cytometry, PBMCs stimulated with LPS, dilution factor recommended by manufacturer  
 IL-2 BV510, Human, Flow cytometry, PBMCs stimulated with PMA plus ionomycin, dilution factor recommended by manufacturer  
 IL-4 BV711, Human, Flow cytometry, PBMCs stimulated with PMA plus ionomycin, dilution factor recommended by manufacturer  
 Perforin Alexa488, Human, Flow cytometry, PBMCs, dilution factor recommended by manufacturer  
 IL-17A Alexa700, Human, Flow cytometry, PBMCs stimulated with PMA plus ionomycin, dilution factor tested in house  
 IL-5 PE, Human, Flow cytometry, PBMCs stimulated with immobilized anti-human CD3 + soluble anti-human CD28 + IL-2 + IL-4 and restimulated with PMA plus ionomycin, dilution factor tested in house  
 IL-9 PerCP-Cy5.5, Human, Flow cytometry, PBMCs stimulated with immobilized anti-human CD3 + soluble anti-human CD28 + IL-2 + IL-4 and restimulated with PMA plus ionomycin, dilution factor tested in house  
 T-bet Alexa647, Human, Flow cytometry, PBMCs stimulated with PMA plus ionomycin, dilution factor tested in house  
 CD62L BV650, Human, Flow cytometry, Peripheral blood, dilution factor recommended by manufacturer  
 CD45RO PE-Cy5, Human, Flow cytometry, Peripheral blood, dilution factor recommended by manufacturer  
 CD300a PE, Human, Flow cytometry, Peripheral blood, dilution factor recommended by manufacturer  
 HLA-DR PE-CF594, Human, Flow cytometry, Peripheral blood, dilution factor recommended by manufacturer  
 CD2 BV421, Human, Flow cytometry, Peripheral blood, dilution factor recommended by manufacturer  
 CD19 Alexa488, Human, Flow cytometry, Peripheral blood, dilution factor recommended by manufacturer  
 CD25 PE-Cy7, Human, Flow cytometry, PBMCs stimulated with PHA, dilution factor recommended by manufacturer  
 CD29 BV510, Human, Flow cytometry, PBMCs, dilution factor recommended by manufacturer  
 CD30 APC, Human, Flow cytometry, PBMCs stimulated with PHA, dilution factor recommended by manufacturer  
 CD54 BV711, Human, Flow cytometry, Peripheral blood, dilution factor recommended by manufacturer  
 CD57 BV605, Human, Flow cytometry, PBMCs, dilution factor recommended by manufacturer  
 CD122 (IL-2R $\beta$ ) PE, Human, Flow cytometry, PBMCs, dilution factor recommended by manufacturer  
 CD10 BUV395, Human, Flow cytometry, Peripheral blood, dilution factor recommended by manufacturer  
 CD13 PE-Cy7, Human, Flow cytometry, Peripheral blood, dilution factor recommended by manufacturer  
 CD14 BV650, Human, Flow cytometry, Peripheral blood, dilution factor recommended by manufacturer  
 CD15 BV605, Human, Flow cytometry, Peripheral blood, dilution factor tested in house  
 CD16 PerCP-Cy5.5, Human, Flow cytometry, Peripheral blood, dilution factor recommended by manufacturer  
 CD33 BV711, Human, Flow cytometry, Peripheral blood, dilution factor recommended by manufacturer  
 CD62L PE-CF594, Human, Flow cytometry, Peripheral blood, dilution factor recommended by manufacturer  
 CD123 BV786, Human, Flow cytometry, PBMCs, dilution factor recommended by manufacturer  
 CD185 Alexa700/APC-Cy5.5, Human, Flow cytometry, PBMCs, dilution factor recommended by manufacturer  
 CD203c BV421, Human, Flow cytometry, Peripheral blood, dilution factor recommended by manufacturer  
 CD279 FITC, Human, Flow cytometry, PBMCs stimulated with PHA, dilution factor recommended by manufacturer  
 CD64 APC-H7, Human, Flow cytometry, Peripheral blood, dilution factor tested in house  
 CD303 APC/Alexa647, Human, Flow cytometry, PBMCs, tested in house  
 CD83 PE-Cy5, Human, Flow cytometry, PBMCs stimulated with GM-CSF+IL-4+TNF  $\alpha$ , dilution factor recommended by manufacturer

CD172b PE, Human, Flow cytometry, Peripheral blood, dilution factor recommended by manufacturer

Immunohistochemistry (Antibody, Application, Sample used for validation, Dilution factor used for validation):

Universal mouse isotype, IHC-P, placenta tissue spiked with SARS-CoV-2 inactivated viruses, pre-made antibody/no dilution needed

Universal rabbit isotype, IHC-P, placenta tissue spiked with SARS-CoV-2 inactivated viruses, pre-made antibody/no dilution needed

SARS-CoV-2 (COVID-19) spike, IHC-P, placenta tissue spiked with SARS-CoV-2 inactivated viruses, dilution range recommended by manufacturer and dilution factor tested in house

SARS-CoV-2 (COVID-19) nucleocapsid, IHC-P, placenta tissue spiked with SARS-CoV-2 inactivated viruses, dilution range recommended by manufacturer and dilution factor tested in house

## Human research participants

Policy information about [studies involving human research participants](#)

Population characteristics

The total study population included pregnant women ranging from 19 - 37 years of age (mean age 27.4 years). All patients self-identified as African-American or White. There were no statistical differences in relevant covariates (age, BMI, primiparity, mode of delivery, etc.) between the study and control groups.

Recruitment

Patients were recruited from among all pregnant women who presented at DMC Hutzel Women's Hospital in Detroit, Michigan, USA. Outside of SARS-CoV-2 positivity, there was no bias in the selection of patients for recruitment. All recruited patients self-identified as African-American, and thus our study population is largely representative of the general Detroit population.

Ethics oversight

The collection and use of human materials for research purposes were approved by the Institutional Review Boards of Wayne State University School of Medicine, Detroit Medical Center, and NICHD.

Note that full information on the approval of the study protocol must also be provided in the manuscript.

## Flow Cytometry

### Plots

Confirm that:

- The axis labels state the marker and fluorochrome used (e.g. CD4-FITC).
- The axis scales are clearly visible. Include numbers along axes only for bottom left plot of group (a 'group' is an analysis of identical markers).
- All plots are contour plots with outliers or pseudocolor plots.
- A numerical value for number of cells or percentage (with statistics) is provided.

### Methodology

Sample preparation

Whole maternal peripheral blood and umbilical cord blood were used for flow cytometry without additional processing.

Instrument

BD LSRFortessa (BD Biosciences)

Software

Flow cytometry data was collected using FACSDiva version 6.0 (BD Biosciences). Flow cytometry data analysis was performed using FlowJo version 10 (FlowJo).

Cell population abundance

Cell sorting to purify specific cell populations for downstream applications was not performed.

Gating strategy

FSC/SSC gating was set to include the main leukocyte population and exclude debris. Positivity thresholds were determined using isotype antibodies and unstained (autofluorescence) controls.

- Tick this box to confirm that a figure exemplifying the gating strategy is provided in the Supplementary Information.
